# Supplementary material for: DEPs Induce Local IgE Class Switching Independent of Their Ability to Stimulate iBALT
Source: Preprints.org preprint supplement (doi:10.20944/preprints202207.0222.v1), 2022-07-14
Supplement: Supplementary file 1 [file supplementary]

## Sheet: spec Ig+Tital IgE
						Data Titre IgE *10-3
			Ag dose	Stimulus	Code	1	2	3	4	5	6	7	mean	SD			1	2	3	4	5	6	7	mean	SD
			0 ug	-	00-0	0.039	0.03	0.118	0.02	0.012	0.06	0.013	0.0417143	0.0153423	0	1	39	30	118	20	12	60	13	41.7143	15.3423
				SRM1650B 30ug	02-0	0.05	0.075	0.115	0.01	0.039	0.012	0.037	0.0482857	0.0150555	DP1	3	50	75	115	10	39	12	37	48.2857	15.0555
				SRM1650B 150ug	01-0	0.02	0.012	0.014	0.055	0.011	0.029	0.124	0.0378571	0.0167221	DP1	5	20	12	14	55	11	29	124	37.8571	16.7221
				SRM2786 30ug	10-0	0.01	0.011	0.02	0.019	0.012	0.013		0.0141667	0.00173969	DP2	7	10	11	20	19	12	13	5	14.1667	1.73969
				SRM2786 150ug	03-0	0.073	0.024	0.081	0.01	0.06	0.021		0.0448333	0.0123085	DP2	9	73	24	81	10	60	21	5	44.8333	12.3085
			0,3 ug	-	00-1	0.01	0.011	0.012	0.055	0.013	0.029	0.024	0.022	0.00664024	0	1.2	10	11	12	55	13	29	24	22	6.64024
				SRM1650B 30ug	02-1	0.03	0.01	0.026	0.031	0.012	0.032	0.092	0.0332857	0.0111947	DP1	3.2	30	10	26	31	12	32	92	33.2857	11.1947
				SRM1650B 150ug	01-1	0.48	0.52	0.442	0.45	1.88	0.157		0.654833	0.250605	DP1	5.2	480	520	442	450	1880	157	0	654.833	250.605
				SRM2786 30ug	10-1	0.01	0.011	0.114	0.183	0.016	0.147		0.0801667	0.0316219	DP2	7.2	10	11	114	183	16	147	0	80.1667	31.6219
				SRM2786 150ug	03-1	0.146	0.165	0.038	0.536	1.877	1.072		0.639	0.292039	DP2	9.2	146	165	38	536	1877	1072	0	639	292.039
			30 ug	-	00-3	0.117	0.045	0.021	0.01	0.029	0.112	0.021	0.0507143	0.0183124	0	1.4	117	45	21	10	29	112	21	50.7143	18.3124
				SRM1650B 30ug	02-3	0.131	0.022	0.028	0.01	0.103	0.043	0.075	0.0588571	0.0185275	DP1	3.4	131	22	28	10	103	43	75	58.8571	18.5275
				SRM1650B 150ug	01-3	0.321	0.134	0.113	3.659	1.515	5.257		1.83317	0.88092	DP1	5.4	321	134	113	3659	1515	5257	0	1833.17	880.92
				SRM2786 30ug	10-3	0.025	0.103	0.231	0.259	0.01	1.624	0.129	0.340143	0.23423	DP2	7.4	25	103	231	259	10	1624	129	340.143	234.23
				SRM2786 150ug	03-3	1.416	0.033	0.154	1.334	8.566	0.047	0.68	1.74714	1.2501	DP2	9.4	1416	33	154	1334	8566	47	680	1747.14	1250.1
																1	1.2	1.4
																3	3.2	3.4
																5	5.2	5.4
																7	7.2	7.4
																9	9.2	9.4
						Data Titre IgG1 *10-3
			Ag dose	Stimulus	Code	1	2	3	4	5	6	7	mean	SD			1	2	3	4	5	6	7	mean	SD
			0 ug	-	00-0	0.12	0.359	0.23	0.137	1.911	0.11	0.447	0.473429	0.265068		1	0.12	0.359	0.23	0.137	1.911	0.11	0.447	0.473429	0.265068
				SRM1650B 30ug	02-0	0.16	0.11	0.109	0.198	0.15	0.133	0.287	0.163857	0.0255936		3	0.16	0.11	0.109	0.198	0.15	0.133	0.287	0.163857	0.0255936
				SRM1650B 150ug	01-0	0.15	0.203	0.145	0.139	0.128	0.101	0.209	0.153571	0.0160759		5	0.15	0.203	0.145	0.139	0.128	0.101	0.209	0.153571	0.0160759
				SRM2786 30ug	10-0	1.829	0.984	0.131	0.456	0.113	0.499		0.668667	0.266719		7	1.829	0.984	0.131	0.456	0.113	0.499		0.668667	0.266719
				SRM2786 150ug	03-0	0.287	1.255	0.08	1.706	0.441	0.755		0.754	0.254471		9	0.287	1.255	0.08	1.706	0.441	0.755		0.754	0.254471
			0,3 ug	-	00-1	0.158	0.13	0.32	0.12	0.234	0.13	0.175	0.181	0.029751		1.2	0.158	0.13	0.32	0.12	0.234	0.13	0.175	0.181	0.029751
				SRM1650B 30ug	02-1	9.3	10.149	6.466	0.996	0.678	7.657	5.99	5.89086	1.53663		3.2	9.3	10.149	6.466	0.996	0.678	7.657	5.99	5.89086	1.53663
				SRM1650B 150ug	01-1	12.54	3.98	7.896	1.998	3.395	11.5	6.776	6.86929	1.66318		5.2	12.54	3.98	7.896	1.998	3.395	11.5	6.776	6.86929	1.66318
				SRM2786 30ug	10-1	0.811	0.872	1.1	1.43	0.153	4.49		1.476	0.629203		7.2	0.811	0.872	1.1	1.43	0.153	4.49		1.476	0.629203
				SRM2786 150ug	03-1	1.345	2.89	5.431	8.008	7.992	1.667		4.5555	1.24202		9.2	1.345	2.89	5.431	8.008	7.992	1.667		4.5555	1.24202
			30 ug	-	00-3	340	56	180	31	8.997	45.32	122.3	111.945	47.7557		1.4	340	56	180	31	8.997	45.32	122.3	111.945	47.7557
				SRM1650B 30ug	02-3	110.7	453.5	129.7	130.8	135.7	176.1	170.1	186.657	49.1578		3.4	110.7	453.5	129.7	130.8	135.7	176.1	170.1	186.657	49.1578
				SRM1650B 150ug	01-3	1025	876.9	3410	234.5	150.6	587.9	565	978.557	457.819		5.4	1025	876.9	3410	234.5	150.6	587.9	565	978.557	457.819
				SRM2786 30ug	10-3	354.2	456.8	157.9	234.5	1098	576.5		479.65	138.573		7.4	354.2	456.8	157.9	234.5	1098	576.5		479.65	138.573
				SRM2786 150ug	03-3	450.7	765.8	189.9	343.2	509.1	455.7		452.4	78.2517		9.4	450.7	765.8	189.9	343.2	509.1	455.7		452.4	78.2517
			Exp 4363 IgG2a titres*10-3
			Dose	Stimulus	Code	Data						mean	SD				1	2	3	4	5	6		mean	SD
			0ug	-	00-0	0.24	0.222	0.225	0.226	0.709		0.3244	0.0878			1	0.24	0.222	0.225	0.226	0.709			0.3244	0.0878
				SRM1650B 30ug	02-0	0.241	0.1	0.12	1.21	1.399		0.614	0.259657			3	0.241	0.1	0.12	1.21	1.399			0.614	0.259657
				SRM1650B 150ug	01-0	0.1	0.335	0.125	0.11	0.235		0.181	0.0415094			5	0.1	0.335	0.125	0.11	0.235			0.181	0.0415094
				SRM2786 30ug	10-0	0.1	0.1	0.11	0.12	0.25		0.136	0.0262306			7	0.1	0.1	0.11	0.12	0.25			0.136	0.0262306
				SRM2786 150ug	03-0	0.125	0.1	0.12	0.507	0.258		0.222	0.0698717			9	0.125	0.1	0.12	0.507	0.258			0.222	0.0698717
			0,3 ug	-	00-1	0.393	0.1	0.11	0.12	0.13	3.787	0.773333	0.604328			1.2	0.393	0.1	0.11	0.12	0.13	3.787		0.773333	0.604328
				SRM1650B 30ug	02-1	0.326	2.144	2.344	0.109	0.5	0.1	0.9205	0.423598			3.2	0.326	2.144	2.344	0.109	0.5	0.1		0.9205	0.423598
				SRM1650B 150ug	01-1	1.185	10.74	0.402	1.399	2.143	2.95	3.1365	1.56108			5.2	1.185	10.74	0.402	1.399	2.143	2.95		3.1365	1.56108
				SRM2786 30ug	10-1	0.28	0.1	1.375	2.4	2.303	1.15	1.268	0.396502			7.2	0.28	0.1	1.375	2.4	2.303	1.15		1.268	0.396502
				SRM2786 150ug	03-1	1.68	0.723	1.86	0.216	3.829	4.777	2.18083	0.725479			9.2	1.68	0.723	1.86	0.216	3.829	4.777		2.18083	0.725479
			30 ug	-	00-3	0.988	0.1	1.117	0.292	1.402	0.1	0.6665	0.233001			1.4	0.988	0.1	1.117	0.292	1.402	0.1		0.6665	0.233001
				SRM1650B 30ug	02-3	0.167	15.235	10.196	17.32	8.341	1.58	8.8065	2.84438			3.4	0.167	15.235	10.196	17.32	8.341	1.58		8.8065	2.84438
				SRM1650B 150ug	01-3	11.926	1.98	15.366	3.487	0.402	2.62	5.9635	2.50327			5.4	11.926	1.98	15.366	3.487	0.402	2.62		5.9635	2.50327
				SRM2786 30ug	10-3	15.38	10.51	5.891	0.841	2.133	2.4	6.1925	2.32791			7.4	15.38	10.51	5.891	0.841	2.133	2.4		6.1925	2.32791
				SRM2786 150ug	03-3	0.264	0.997	1.997	1.477	5.48	4.57	2.46417	0.850623			9.4	0.264	0.997	1.997	1.477	5.48	4.57		2.46417	0.850623
			Exp 4363 IgA*10-3
			Dose	Stimulus	Code	Data						mean	SD				1	2	3	4	5	6		mean	SD
			0ug	-	00-0	0.1	0.181	0.11	0.548	0.12		0.2118	0.077784			1	0.1	0.181	0.11	0.548	0.12			0.2118	0.077784
				SRM1650B 30ug	02-0	0.1	0.254	0.11	0.128	0.12		0.1424	0.0258235			3	0.1	0.254	0.11	0.128	0.12			0.1424	0.0258235
				SRM1650B 150ug	01-0	0.1	0.11	0.476	0.599	0.12		0.281	0.0972491			5	0.1	0.11	0.476	0.599	0.12			0.281	0.0972491
				SRM2786 30ug	10-0	0.258	0.31	0.11	0.271	0.1		0.2098	0.0398481			7	0.258	0.31	0.11	0.271	0.1			0.2098	0.0398481
				SRM2786 150ug	03-0	0.442	0.1	0.467	0.253	0.11		0.2744	0.071599			9	0.442	0.1	0.467	0.253	0.11			0.2744	0.071599
			0,3 ug	-	00-1	0.133	0.1	0.183	0.11	0.136	0.12	0.130333	0.0119046			1.2	0.133	0.1	0.183	0.11	0.136	0.12		0.130333	0.0119046
				SRM1650B 30ug	02-1	0.1	0.11	0.12	0.13	0.153	0.14	0.1255	0.00797226			3.2	0.1	0.11	0.12	0.13	0.153	0.14		0.1255	0.00797226
				SRM1650B 150ug	01-1	0.1	0.324	0.11	0.12	0.246	0.13	0.171667	0.0374423			5.2	0.1	0.324	0.11	0.12	0.246	0.13		0.171667	0.0374423
				SRM2786 30ug	10-1	0.568	0.301	0.174	0.1	0.343	0.11	0.266	0.0727204			7.2	0.568	0.301	0.174	0.1	0.343	0.11		0.266	0.0727204
				SRM2786 150ug	03-1	0.1	0.567	0.11	0.265	0.12	0.13	0.215333	0.074573			9.2	0.1	0.567	0.11	0.265	0.12	0.13		0.215333	0.074573
			30 ug	-	00-3	0.1	0.11	0.739	0.173	0.12	0.13	0.228667	0.102565			1.4	0.1	0.11	0.739	0.173	0.12	0.13		0.228667	0.102565
				SRM1650B 30ug	02-3	0.1	0.11	0.254	0.12	0.13	0.452	0.194333	0.0564469			3.4	0.1	0.11	0.254	0.12	0.13	0.452		0.194333	0.0564469
				SRM1650B 150ug	01-3	0.1	0.11	0.12	0.769	0.454	0.13	0.2805	0.112344			5.4	0.1	0.11	0.12	0.769	0.454	0.13		0.2805	0.112344
				SRM2786 30ug	10-3	0.597	2.95	2.171	8.593	0.1	13.49	4.65017	2.1587			7.4	0.597	2.95	2.171	8.593	0.1	13.49		4.65017	2.1587
				SRM2786 150ug	03-3	1.215	1.327	2.714	0.864	0.232	5.158	1.91833	0.728505			9.4	1.215	1.327	2.714	0.864	0.232	5.158		1.91833	0.728505
			Exp 4363 Total IgE*10-3
				Total IgE*10-3							mean	SD
			0ug	-	0.1	0.1	3.97317	7.62903	0.1	0.208952	2.01853	1.28575
				SRM1650B 30ug	0.1	0.345	5.689	0.1	0.1	0.987	1.22017	0.904523
				SRM1650B 150ug	18.4879	17.9052	17.9052	13.512	18.2944	1.918	14.6705	2.66153
				SRM2786 150ug	2.123	3.452	0.1	0.115	0.675	2.345	1.46833	0.561586
				SRM2786 150ug	2.05058	4.63683	9.17351	11.4187	17.0032	6.914	8.53281	2.16215
			0,3 ug	-	0.199974	0.788152	0.1	1.69847	2.39766	0.285643	0.91165	0.382878
				SRM1650B 30ug	0.239	0.1	0.212	1.132	0.87	1.335	0.648	0.216995
				SRM1650B 150ug	14.1196	7.21096	5.40309	13.2665	9.13317	1.763	8.48273	1.92607
				SRM2786 150ug	3.21	0.1	0.1	2.345	2.981	0.65	1.56433	0.590051
				SRM2786 150ug	14.1256	21.9883	18.4339	17.1843	14.8649	2.901	14.9163	2.66106
			30 ug	-	0.1	0.533382	0.44114	0.1	0.182937	0.1	0.24291	0.0792584
				SRM1650B 30ug	0.429	0.215	0.1	0.923	0.1	0.346	0.352167	0.126172
				SRM1650B 150ug	15.9145	7.03676	18.4879	17.5129	0.1	0.236	9.88135	3.48979
				SRM2786 150ug	0.1	4.552	0.1	0.349	0.1	0.778	0.9965	0.719102
				SRM2786 150ug	14.1051	15.1767	4.1741	7.90824	13.73	5.731	10.1375	1.94887

## Sheet: Figure 1
				Data Titre IgE *10-3
	Ag dose	Stimulus	Code	1	2	3	4	5	6	7	mean	SD								матрица
	0 ug	-	00-0	0.039	0.03	0.118	0.02	0.012	0.06	0.013	0.0417143	0.0153423								0.85	1.2
		SRM1650B 30ug	02-0	0.05	0.075	0.115	0.01	0.039	0.012	0.037	0.0482857	0.0150555								1.85	2.2
		SRM1650B 150ug	01-0	0.02	0.012	0.014	0.055	0.011	0.029	0.124	0.0378571	0.0167221								2.85	3.2
		SRM2786 30ug	10-0	0.01	0.011	0.02	0.019	0.012	0.013		0.0141667	0.00173969								3.85	4.2
		SRM2786 150ug	03-0	0.073	0.024	0.081	0.01	0.06	0.021		0.0448333	0.0123085								4.85	5.2
	0,3 ug	-	00-1	0.01	0.011	0.012	0.055	0.013	0.029	0.024	0.022	0.00664024
		SRM1650B 30ug	02-1	0.03	0.01	0.026	0.031	0.012	0.032	0.092	0.0332857	0.0111947							Средние подгрупп - значения столбиков - даны в рядах 7 и 15
		SRM1650B 150ug	01-1	0.48	0.52	0.442	0.45	1.88	0.157		0.654833	0.250605
		SRM2786 30ug	10-1	0.01	0.011	0.114	0.183	0.016	0.147		0.0801667	0.0316219
		SRM2786 150ug	03-1	0.146	0.165	0.038	0.536	1.877	1.072		0.639	0.292039
	30 ug	-	00-3	0.117	0.045	0.021	0.01	0.029	0.112	0.021	0.0507143	0.0183124
		SRM1650B 30ug	02-3	0.131	0.022	0.028	0.01	0.103	0.043	0.075	0.0588571	0.0185275
		SRM1650B 150ug	01-3	0.321	0.134	0.113	3.659	1.515	5.257		1.83317	0.88092
		SRM2786 30ug	10-3	0.025	0.103	0.231	0.259	0.01	1.624	0.129	0.340143	0.23423
		SRM2786 150ug	03-3	1.416	0.033	0.154	1.334	8.566	0.047	0.68	1.74714	1.2501
				Data Titre IgG1 *10-3
	Ag dose	Stimulus	Code	1	2	3	4	5	6	7	mean	SD
	0 ug	-	00-0	0.12	0.359	0.23	0.137	1.911	0.11	0.447	0.473429	0.265068
		SRM1650B 30ug	02-0	0.16	0.11	0.109	0.198	0.15	0.133	0.287	0.163857	0.0255936
		SRM1650B 150ug	01-0	0.15	0.203	0.145	0.139	0.128	0.101	0.209	0.153571	0.0160759
		SRM2786 30ug	10-0	1.829	0.984	0.131	0.456	0.113	0.499		0.668667	0.266719
		SRM2786 150ug	03-0	0.287	1.255	0.08	1.706	0.441	0.755		0.754	0.254471
	0,3 ug	-	00-1	0.158	0.13	0.32	0.12	0.234	0.13	0.175	0.181	0.029751
		SRM1650B 30ug	02-1	9.3	10.149	6.466	0.996	0.678	7.657	5.99	5.89086	1.53663
		SRM1650B 150ug	01-1	12.54	3.98	7.896	1.998	3.395	11.5	6.776	6.86929	1.66318
		SRM2786 30ug	10-1	0.811	0.872	1.1	1.43	0.153	4.49		1.476	0.629203
		SRM2786 150ug	03-1	1.345	2.89	5.431	8.008	7.992	1.667		4.5555	1.24202
	30 ug	-	00-3	340	56	180	31	8.997	45.32	122.3	111.945	47.7557
		SRM1650B 30ug	02-3	110.7	453.5	129.7	130.8	135.7	176.1	170.1	186.657	49.1578
		SRM1650B 150ug	01-3	1025	876.9	3410	234.5	150.6	587.9	565	978.557	457.819
		SRM2786 30ug	10-3	354.2	456.8	157.9	234.5	1098	576.5		479.65	138.573
		SRM2786 150ug	03-3	450.7	765.8	189.9	343.2	509.1	455.7		452.4	78.2517
	Exp 4363 IgG2a titres*10-3
																									матрица
	Dose	Stimulus	Code	Data						mean	SD														0.85	1.2
	0ug	-	00-0	0.24	0.222	0.225	0.226	0.709		0.3244	0.0878														1.85	2.2
		SRM1650B 30ug	02-0	0.241	0.1	0.12	1.21	1.399		0.614	0.259657														2.85	3.2
		SRM1650B 150ug	01-0	0.1	0.335	0.125	0.11	0.235		0.181	0.0415094														3.85	4.2
		SRM2786 30ug	10-0	0.1	0.1	0.11	0.12	0.25		0.136	0.0262306														4.85	5.2
		SRM2786 150ug	03-0	0.125	0.1	0.12	0.507	0.258		0.222	0.0698717
	0,3 ug	-	00-1	0.393	0.1	0.11	0.12	0.13	3.787	0.773333	0.604328
		SRM1650B 30ug	02-1	0.326	2.144	2.344	0.109	0.5	0.1	0.9205	0.423598
		SRM1650B 150ug	01-1	1.185	10.74	0.402	1.399	2.143	2.95	3.1365	1.56108
		SRM2786 30ug	10-1	0.28	0.1	1.375	2.4	2.303	1.15	1.268	0.396502
		SRM2786 150ug	03-1	1.68	0.723	1.86	0.216	3.829	4.777	2.18083	0.725479
	30 ug	-	00-3	0.988	0.1	1.117	0.292	1.402	0.1	0.6665	0.233001
		SRM1650B 30ug	02-3	0.167	15.235	10.196	17.32	8.341	1.58	8.8065	2.84438
		SRM1650B 150ug	01-3	11.926	1.98	15.366	3.487	0.402	2.62	5.9635	2.50327
		SRM2786 30ug	10-3	15.38	10.51	5.891	0.841	2.133	2.4	6.1925	2.32791
		SRM2786 150ug	03-3	0.264	0.997	1.997	1.477	5.48	4.57	2.46417	0.850623
				Количество эозинофилов, 10^3/ml
	Ag dose	Stimulus	Code	1	2	3	4	5	6	7	mean	SD
	0 ug	-	00-0	34.0203	2.58969	2.83983	2.29082	11.67			10.6821	5.58585
		SRM1650B 150ug	01-0	51.67	28.849	4.86244	7.35983	22.13			22.9743	7.75045
	0,3 ug	-	00-1	40.6488	2.63915	4.51243	20.0421	15.67			16.7025	6.25594
		SRM1650B 150ug	01-1	77.0901	63.3785	81.3234	21.9381	15.1			51.766	12.7707
	30 ug	-	00-3	10.5018	0.731707	37.5485	14.98	15.567			15.8658	5.53213
		SRM1650B 150ug	01-3	25.0976	17.9905	36.347	21.9381	15.65			23.4046	3.31669
				Количество нейтрофилов, 10^3/ml
	Ag dose	Stimulus	Code	1	2	3	4	5	6	7	mean	SD
	0 ug	-	00-0	0.848387	0.112108	0.0663857	0.38574	0.321			0.346724	0.127558
		SRM1650B 150ug	01-0	2.62769	0.433168	1.28636	0.381558	1.237			1.19316	0.372522
	0,3 ug	-	00-1	0.234067	0.0931921	1.94337	0.172224	0.76			0.64057	0.317177
		SRM1650B 150ug	01-1	17.6693	0.913698	6.85385	9.3123	10.35			9.01982	2.48508
	30 ug	-	00-3	5.40047	0.0487805	4.92739	4.67931	3.7			3.75119	0.885555
		SRM1650B 150ug	01-3	22.9164	16.0884	14.0403	17.5	9.1			15.929	2.06469
				Количество макрофагов, 10^3/ml
	Ag dose	Stimulus	Code	1	2	3	4	5	6	7	mean	SD
	0 ug	-	00-0	35.9716	5.04484	2.6628	13.5166	10.87			13.6132	5.42457
		SRM1650B 150ug	01-0	198.749	27.9827	17.6746	26.5649	50.54			64.3023	31.2006
	0,3 ug	-	00-1	14.5279	8.58787	56.3876	54.0578	25.6			31.8322	9.10796
		SRM1650B 150ug	01-1	9.69546	20.4411	85.8738	91.1642	40.34			49.5029	15.2958
	30 ug	-	00-3	6.93958	0.943089	22.1732	10.0381	12.33			10.4848	3.19985
		SRM1650B 150ug	01-3	65.2106	173.977	161.779	95.01	77.08			114.611	20.4737

## Sheet: Cells
						Количество эозинофилов, 10^3/ml											1	2	3	4	5	6		mean	SD
		Ag dose	Stimulus	Code		1	2	3	4	5	6	7	mean	SD		1	34.0203	2.58969	2.83983	2.29082	11.67			10.6821	5.58585
		0 ug	-	00-0		34.0203	2.58969	2.83983	2.29082	11.67			10.6821	5.58585		3	51.67	28.849	4.86244	7.35983	22.13			22.9743	7.75045
			SRM1650B 150ug	01-0		51.67	28.849	4.86244	7.35983	22.13			22.9743	7.75045		1.2	40.6488	2.63915	4.51243	20.0421	15.67			16.7025	6.25594
		0,3 ug	-	00-1		40.6488	2.63915	4.51243	20.0421	15.67			16.7025	6.25594		3.2	77.0901	63.3785	81.3234	21.9381	15.1			51.766	12.7707
			SRM1650B 150ug	01-1		77.0901	63.3785	81.3234	21.9381	15.1			51.766	12.7707		1.4	10.5018	0.731707	37.5485	14.98	15.567			15.8658	5.53213
		30 ug	-	00-3		10.5018	0.731707	37.5485	14.98	15.567			15.8658	5.53213		3.4	25.0976	17.9905	36.347	21.9381	15.65			23.4046	3.31669
			SRM1650B 150ug	01-3		25.0976	17.9905	36.347	21.9381	15.65			23.4046	3.31669
						Количество нейтрофилов, 10^3/ml											1	2	3	4	5	6		mean	SD
		Ag dose	Stimulus	Code		1	2	3	4	5	6	7	mean	SD		1	0.848387	0.112108	0.0663857	0.38574	0.321			0.346724	0.127558
		0 ug	-	00-0		0.848387	0.112108	0.0663857	0.38574	0.321			0.346724	0.127558		3	2.62769	0.433168	1.28636	0.381558	1.237			1.19316	0.372522
			SRM1650B 150ug	01-0		2.62769	0.433168	1.28636	0.381558	1.237			1.19316	0.372522		1.2	0.234067	0.0931921	1.94337	0.172224	0.76			0.64057	0.317177
		0,3 ug	-	00-1		0.234067	0.0931921	1.94337	0.172224	0.76			0.64057	0.317177		3.2	17.6693	0.913698	6.85385	9.3123	10.35			9.01982	2.48508
			SRM1650B 150ug	01-1		17.6693	0.913698	6.85385	9.3123	10.35			9.01982	2.48508		1.4	5.40047	0.0487805	4.92739	4.67931	3.7			3.75119	0.885555
		30 ug	-	00-3		5.40047	0.0487805	4.92739	4.67931	3.7			3.75119	0.885555		3.4	22.9164	16.0884	14.0403	17.5	9.1			15.929	2.06469
			SRM1650B 150ug	01-3		22.9164	16.0884	14.0403	17.5	9.1			15.929	2.06469
						Количество макрофагов, 10^3/ml
		Ag dose	Stimulus	Code		1	2	3	4	5	6	7	mean	SD			1	2	3	4	5	6		mean	SD
		0 ug	-	00-0		35.9716	5.04484	2.6628	13.5166	10.87			13.6132	5.42457		1	35.9716	5.04484	2.6628	13.5166	10.87			13.6132	5.42457
			SRM1650B 150ug	01-0		198.749	27.9827	17.6746	26.5649	50.54			64.3023	31.2006		3	198.749	27.9827	17.6746	26.5649	50.54			64.3023	31.2006
		0,3 ug	-	00-1		14.5279	8.58787	56.3876	54.0578	25.6			31.8322	9.10796		1.2	14.5279	8.58787	56.3876	54.0578	25.6			31.8322	9.10796
			SRM1650B 150ug	01-1		9.69546	20.4411	85.8738	91.1642	40.34			49.5029	15.2958		3.2	9.69546	20.4411	85.8738	91.1642	40.34			49.5029	15.2958
		30 ug	-	00-3		6.93958	0.943089	22.1732	10.0381	12.33			10.4848	3.19985		1.4	6.93958	0.943089	22.1732	10.0381	12.33			10.4848	3.19985
			SRM1650B 150ug	01-3		65.2106	173.977	161.779	95.01	77.08			114.611	20.4737		3.4	65.2106	173.977	161.779	95.01	77.08			114.611	20.4737

## Sheet: Figure 2
	Exp 4363 IgG2a titres*10-3
	Dose	Stimulus	Code	Data						mean	SD
	0ug	-	00-0	0.24	0.222	0.225	0.226	0.709		0.3244	0.0878											матрица
		SRM1650B 30ug	02-0	0.241	0.1	0.12	1.21	1.399		0.614	0.259657											0.85	1.2
		SRM1650B 150ug	01-0	0.1	0.335	0.125	0.11	0.235		0.181	0.0415094											1.85	2.2
		SRM2786 30ug	10-0	0.1	0.1	0.11	0.12	0.25		0.136	0.0262306											2.85	3.2
		SRM2786 150ug	03-0	0.125	0.1	0.12	0.507	0.258		0.222	0.0698717											3.85	4.2
	0,3 ug	-	00-1	0.393	0.1	0.11	0.12	0.13	3.787	0.773333	0.604328											4.85	5.2
		SRM1650B 30ug	02-1	0.326	2.144	2.344	0.109	0.5	0.1	0.9205	0.423598
		SRM1650B 150ug	01-1	1.185	10.74	0.402	1.399	2.143	2.95	3.1365	1.56108
		SRM2786 30ug	10-1	0.28	0.1	1.375	2.4	2.303	1.15	1.268	0.396502
		SRM2786 150ug	03-1	1.68	0.723	1.86	0.216	3.829	4.777	2.18083	0.725479
	30 ug	-	00-3	0.988	0.1	1.117	0.292	1.402	0.1	0.6665	0.233001
		SRM1650B 30ug	02-3	0.167	15.235	10.196	17.32	8.341	1.58	8.8065	2.84438
		SRM1650B 150ug	01-3	11.926	1.98	15.366	3.487	0.402	2.62	5.9635	2.50327
		SRM2786 30ug	10-3	15.38	10.51	5.891	0.841	2.133	2.4	6.1925	2.32791
		SRM2786 150ug	03-3	0.264	0.997	1.997	1.477	5.48	4.57	2.46417	0.850623
	Exp 4363 IgA*10-3
	Dose	Stimulus	Code	Data						mean	SD
	0ug	-	00-0	0.1	0.181	0.11	0.548	0.12		0.2118	0.077784
		SRM1650B 30ug	02-0	0.1	0.254	0.11	0.128	0.12		0.1424	0.0258235
		SRM1650B 150ug	01-0	0.1	0.11	0.476	0.599	0.12		0.281	0.0972491
		SRM2786 30ug	10-0	0.258	0.31	0.11	0.271	0.1		0.2098	0.0398481
		SRM2786 150ug	03-0	0.442	0.1	0.467	0.253	0.11		0.2744	0.071599
	0,3 ug	-	00-1	0.133	0.1	0.183	0.11	0.136	0.12	0.130333	0.0119046
		SRM1650B 30ug	02-1	0.1	0.11	0.12	0.13	0.153	0.14	0.1255	0.00797226
		SRM1650B 150ug	01-1	0.1	0.324	0.11	0.12	0.246	0.13	0.171667	0.0374423
		SRM2786 30ug	10-1	0.568	0.301	0.174	0.1	0.343	0.11	0.266	0.0727204
		SRM2786 150ug	03-1	0.1	0.567	0.11	0.265	0.12	0.13	0.215333	0.074573
	30 ug	-	00-3	0.1	0.11	0.739	0.173	0.12	0.13	0.228667	0.102565
		SRM1650B 30ug	02-3	0.1	0.11	0.254	0.12	0.13	0.452	0.194333	0.0564469
		SRM1650B 150ug	01-3	0.1	0.11	0.12	0.769	0.454	0.13	0.2805	0.112344
		SRM2786 30ug	10-3	0.597	2.95	2.171	8.593	0.1	13.49	4.65017	2.1587
		SRM2786 150ug	03-3	1.215	1.327	2.714	0.864	0.232	5.158	1.91833	0.728505

## Sheet: PCR
																				150	150	150	150	150	150
	germline e	germline e Lungs
		germline e	group	0 ug OVA	0 ug OVA+ 150 ug SRM1650B	0,3 ug OVA	0,3 ug OVA+ 150 ug SRM1650B	30 ug OVA	30 ug OVA + 150 ug SRM1650B	0 ug OVA+ 150ug SRM2786	0,3 ug OVA+ 150ug SRM2786	30 ug OVA+ 150ug SRM2786					0 ug OVA	0,3 ug OVA	30 ug OVA	0 ug OVA+ 150 ug SRM1650B	0,3 ug OVA+ 150 ug SRM1650B	30 ug OVA + 150 ug SRM1650B	0 ug OVA+ 150ug SRM2786	0,3 ug OVA+ 150ug SRM2786	30 ug OVA+ 150ug SRM2786									SD
			Data	0.0282091	14.1018	0.506886	12.9763	1.01946	9.75094	2.63705	95.1441	147.684								DP1	DP1	DP1	DP2	DP2	DP2				OVA
				0.102098	0.459395	0.77798	40.9016	1.02655	9.95026	0.338531	2.74996	65.6436				OVA	0	0.3	30	0	0.3	30	0	0.3	30					PBS	OVA 0.3	OVA 30
				2.02181	1.16821	0.686059	3.28936	4.668	1.32208	0.171354	9.42227	164.853			germline e	mean	1	0.502087	3.86743	5.18588	10.2258	6.9189	0.708245	25.1151	105.753			germline e	Control	1	0.502087	3.86743		0.424308	0.166122	1.36635
				0.481333	0.405509	0.0121909	1.19566	8.61148	17.2292	0.285586	3.47789	41.2133			lungs	SD	0.424308	0.166122	1.36635	2.48519	7.00656	2.89912	0.430888	17.612	33.4801			lungs	DP1	5.18588	10.2258	6.9189		2.48519	7.00656	2.89912
				2.19285	6.16699	0.928247	0.797085	5.87583	1.41697	0.686285	14.7811	200			germline e	mean	1	0.292742	1.0127	0.736305	27.6496	0.894164	53.3272	3.79421	92.3982				DP2	0.708245	25.1151	106		0.430888	17.612	33.4801
				1.17371	8.81341	0.101162	2.19509	2.00324	1.84396	0.130664		15.1227			LN	SD	0.688605	0.189337	0.440192	0.300713	12.4359	0.594692	28.9384	1.32261	36.7083
	germline e		mean	1	5.18588	0.502087	10.2258	3.86743	6.9189	0.708245	25.1151	105.753			mu-e	mean	1	0.437783	2.26065	97.2954	22.4453	33.6871	273.433	628.362	636.389			germline e	Control	1	0.292742	1.0127		0.688605	0.189337	0.440192
	lungs		SD	0.424308	2.48519	0.166122	7.00656	1.36635	2.89912	0.430888	17.612	33.4801			lungs	SD	0.517714	0.154328	0.71682	52.1648	12.1958	15.7003	124.416	278.091	252.438			LN	DP1	0.736305	27.6496	0.894164		0.300713	12.4359	0.594692
					0.0685545	0.114241	0.0905947	0.0276594	0.0511181	0.339047	0.123556	0.00917824			mu-e	mean	1	5.88628	1.80311	62.3188	56.1169	1.22765	143.889	46.7781	29.6912				DP2	53.3272	3.79421	92.3982	0.790867	28.9384	1.32261	36.7083
											0.118457	0.0103198			LN	SD	0.452942	2.94729	1.3242	28.277	28.9806	0.710553	65.0371	29.9075	12.8011
								0.0276594							G1-e	mean	1	3.33241	16.8809	1.79711	26.7865	44.8731	91.6451	33.4054	64.3444			mu-e	Control	1	0.437783	2.26065		0.517714	0.154328	0.71682
															Lungs	SD	0.74971	2.0688	5.37903	0.865028	10.0796	27.1314	44.9706	17.7851	50.2009			lungs	DP1	97.2954	22.4453	33.6871		52.1648	12.1958	15.7003
	germline e	germline e LN													g1-e	mean	1	3.0954	0.231374	10.6884	2.12267	0.752472	20.1338	217.811	73.7725				DP2	273.433	628.362	636.389		124.416	278.091	252.438
		germline e	group												LN	SD	0.54224	0.949237	0.106555	5.75961	0.533355	0.378769	7.86134	117.419	46.9435
			Data	0.000770418	0.314728	0.119322	2.13605	0.554208	1.18758	1.46854	2.85671	75.5387			germ g1	mean	1	50.0918	437.242	251.711	787.89	144.676	111.288	2481	1316.19			mu-e	Control	1	5.88628	1.80311		0.452942	2.94729	1.3242
				3.88316	0.119322	0.0847052	78.1368	2.79516	3.45319	103.969	0.944443	126.197			Lungs	SD	0.812092	21.9598	267.682	83.7789	415.16	120.359	53.6742	1495.93	785.38			LN	DP1	62.3188	56.1169	1.22765		28.277	28.9806	0.710553
				0.09625	0.711004	0.0443424	21.5858	0.243658	0.119736	13.1035	8.36258	229.422			germ g1	mean	0.500707	10.2199	0.422797	8.68735	6.86752	6.62986	76.2731	0.421076	28.9658				DP2	143.889	46.7781	29.6912	0.295886	65.0371	29.9075	12.8011
				0.0160964	0.185299	1.14277	33.4533	0.22082	0.565477	37.2739	5.38478	6.50539			LN	SD	0.317678	2.46997	0.227536	4.15352	2.41449	3.99939	64.5529	0.155649	15.7892
				1.6344	1.7697	0.0890532	2.96019	0.794013	0.0235673	160.263	4.69091	102.578			post e	mean	1.3174	0.653396	1.90906	8.90912	70.9843	26.9611	47.3126	954.51	778.429			G1-e	Control	1	3.33241	16.8809		0.74971	2.0688	5.37903
				0.369317	1.31777	0.276255	27.6255	1.46832	0.0154315	3.88514	0.525873	14.1493			Lungs	SD	0.941011	0.433902	1.09329	1.15942	42.3229	18.5743	37.913	389.279	311.191			Lungs	DP1	1.79711	26.7865	44.8731		0.865028	10.0796	27.1314
	germline e		mean	1	0.736305	0.292742	27.6496	1.0127	0.894164	53.3272	3.79421	92.3982			post e	mean	1	13.0911	0.078553	37.0931	177.039	6.70902	58.9044	4.36371	327.438				DP2	91.6451	33.4054	64.3444		44.9706	17.7851	50.2009
	LN		SD	0.688605	0.300713	0.189337	12.4359	0.440192	0.594692	28.9384	1.32261	36.7083			LN	SD	0.532148	8.4944	0.0207496	29.1759	69.6998	1.80374	35.0587	1.63612	98.9253
															post g1	mean	1	13.5055	4.97156	16.3737	116.792	28.7176	206.924	19.3993	3.28407			g1-e	Control	1	3.0954	0.231374		0.54224	0.949237	0.106555
															Lungs	SD	0.411219	8.07086	1.41124	13.9889	89.3401	17.0184	102.555	11.7058	1.8531			LN	DP1	10.6884	2.12267	0.752472		5.75961	0.533355	0.378769
															post g1	mean	1	10.2726	14.449	0.344648	43.2976	3.37784	53.667	86.0537	31.2036				DP2	20.1338	217.811	73.7725	0.200918	7.86134	117.419	46.9435
	Circular mu-epsilon	Circular mu-epsilon Lungs													LN	SD	0.235281	2.30003	12.8232	0.176418	30.9012	1.50634	16.9381	48.2737	16.4551
		Circular mu-epsilon	group
			Data	0.132203	286.19	0.2467	23.4633	0.449317	29.2317	82.9699	1754.66	1361.51															germ g1	mean	Control	1	50.0918	437.242		0.812092	21.9598	267.682
				0.0416896	4.66162	0.0407427	41.7587	4.18142	5.62941	60.7011	513.782	184.605															Lungs	SD	DP1	251.711	787.89	144.676		83.7789	415.16	120.359
				1.95997	65.8372	0.696165	66.7563	1.02808	0.208892	188.445	110.178	1312.87																	DP2	111.288	2481	1316.19		53.6742	1495.93	785.38
				1.06144	125.157	0.313402	1.51659	2.59493	87.4151	702.548	878.445	51.5167
				2.78144		0.995014	0.0631896	4.06551	14.3784	541.406	96.9594	418.292																germ g1	Control	0.500707	10.2199	0.422797		0.317678	2.46997	0.227536
				0.0232617	4.63105	0.334675	1.11371	1.24467	65.2592	64.5298	416.142	489.541																LN	DP1	8.68735	6.86752	6.62986		4.15352	2.41449	3.99939
	mu-e		mean	1	97.2954	0.437783	22.4453	2.26065	33.6871	273.433	628.362	636.389																	DP2	76.2731	0.421076	28.9658	-0.183255	64.5529	0.155649	15.7892
	lungs		SD	0.517714	52.1648	0.154328	12.1958	0.71682	15.7003	124.416	278.091	252.438
																												post e	Control	1.3174	0.653396	1.90906		0.941011	0.433902	1.09329
																												Lungs	DP1	8.90912	70.9843	26.9611		1.15942	42.3229	18.5743
																													DP2	47.3126	954.51	778.429		37.913	389.279	311.191
	Circular mu-epsilon	Circular mu-epsilon LN
		Circular mu-epsilon	group
			Data	0.896471	4.3389	18.4376	5.26827	0.0393606	0.337375	105.735	6.70221	84.9811
				0.551576	11.8165	7.03582	177.58	0.0582422	0.981002	14.6206	8.49999	19.8462																post e	Control	1	13.0911	0.078553		0.532148	8.4944	0.0207496
				0	15.9704	0.186942	12.8378	0.250927	4.35396	283.59	12.1157	29.0245																LN	DP1	37.0931	177.039	6.70902		29.1759	69.6998	1.80374
				2.8801	98.178	1.88861	70.3382	2.29315	0.334963	91.9287	82.3589	21.4594																	DP2	58.9044	4.36371	327.438	0.426882	35.0587	1.63612	98.9253
				1.25218	164.447	2.74599	15.4264	0.571303	1.24549	6.86709	2.11919	21.9343
				0.41967	79.1626	5.02273	55.25	7.60567	0.113141	360.592	168.873	0.901561																post g1	Control	1	13.5055	4.97156		0.411219	8.07086	1.41124
	mu-e		mean	1	62.3188	5.88628	56.1169	1.80311	1.22765	143.889	46.7781	29.6912																Lungs	DP1	16.3737	116.792	28.7176		13.9889	89.3401	17.0184
	LN		SD	0.452942	28.277	2.94729	28.9806	1.3242	0.710553	65.0371	29.9075	12.8011																	DP2	206.924	19.3993	3.28407		102.555	11.7058	1.8531
																												post g1	Control	1	10.2726	14.449		0.235281	2.30003	12.8232
																												LN	DP1	0.344648	43.2976	3.37784		0.176418	30.9012	1.50634
	Circular mu-epsilon	Circular gamma1-epsilon Lungs																											DP2	53.667	86.0537	31.2036	0.433162	16.9381	48.2737	16.4551
		Circular mu-epsilon	group
			Data	0.00401463	5.57698	3.83569	11.4002	10.0525	6.1453	54.9992	5.04789	92.3027																	OVA	PBS
				1.29638	0.56624	0.0997516	12.6036	32.1451	7.68787	5.88892	36.6743	5.1284																		germline e	mu-e	g1-e	postswitch e	germline g1	postswitch g1
				0.000245788	1.29189	1.21819	9.36168	3.88955	104.292	74.0917	2.00696	0.402474																PBS	Control	1	1	1	1.3174	1	1	0.424308	0.517714	0.74971	0.941011	0.812092	0.411219
				0.425802	0.499821	12.3095	47.1598	13.9173	139.535	270.703	110.178	2.28047																lungs	DEP1	5.18588	97.2954	1.79711	8.90912	251.711	16.3737	2.48519	52.1648	0.865028	1.15942	83.7789	13.9889
				4.27074	0.810109	2.50491	62.878	31.6052	1.40913	5.36478	27.4514	3.9967																	DEP2	1.5	273.433	91.6451	47.3126	111.288	206.924	0.430888	124.416	44.9706	37.913	53.6742	102.555
				0.00282556	2.03762	0.0264324	17.316	9.676	10.1694	138.823	19.074	281.955
	G1-e		mean	1	1.79711	3.33241	26.7865	16.8809	44.8731	91.6451	33.4054	64.3444																LN	Control	1	1	1	1	0.7	1	0.688605	0.452942	0.54224	0.532148	0.4	0.235281
	Lungs		SD	0.74971	0.865028	2.0688	10.0796	5.37903	27.1314	44.9706	17.7851	50.2009																	DP1	1.5	62.3188	10.6884	37.0931	8.68735	0.9	0.300713	28.277	5.75961	29.1759	4.15352	0.176418
																													DP2	53.3272	143.889	20.1338	58.9044	76.2731	53.667	28.9384	65.0371	7.86134	35.0587	64.5529	16.9381
																														germlen e	mu-e	g1-e	postswitch e	germ g1	postswitch g1
	Circular gamma1-epsilon	Circular gamma1-epsilon LN																											Control	1.1	0.437783	3.33241	0.653396	50.0918	13.5055	0.166122	0.154328	2.0688	0.389875	21.9598	8.07086
		Circular gamma1-epsilon	group																									OVA 0.3	DP1	10.2258	22.4453	26.7865	70.9843	787.89	116.792	7.00656	12.1958	10.0796	52.7326	415.16	89.3401
			Data	0.00327528	0.750958	4.05818	3.00181	0.589026	0.631096	45.1749	193.584	267.24																lungs	DP2	25.1151	628.362	33.4054	954.51	2481	19.3993	17.612	278.091	17.7851	305.25	1495.93	11.7058
				0.0606942	1.26818	6.58062	1.45023	0.185673	0.390928	6.8803	1.40643	125.914
				0.102297	24.1815	1.52714	0.210346	0.000505792	0.313291	11.2928	43.5182	7.59116																	Control	1	5.88628	3.0954	13.0911	10.2199	10.2726	0.189337	2.94729	0.949237	8.4944	2.65709	2.30003
				2.55059	29.8743	0.441606	2.11766	0.454022	2.40401	13.8743	432.423	9.91412																LN	DP1	27.6496	56.1169	2.12267	177.039	6.86752	43.2976	12.4359	28.9806	0.533355	69.6998	2.44043	30.9012
				2.4981	5.73913	3.02873	3.60708	0.0254354	0.0221584	39.4665	635.756	16.9943																	DP2	3.79421	46.7781	217.811	4.36371	6	86.0537	1.32261	29.9075	117.419	1.63612	0.15452	48.2737
				0.785037	2.31606	2.93611	2.34889	0.133585	0.753345	4.11368	0.181355	14.9816
	g1-e		mean	1	10.6884	3.0954	2.12267	0.231374	0.752472	20.1338	217.811	73.7725																OVA 30	Control	3.86743	2.26065	16.8809	1.90906	437.242	4.97156	1.36635	0.71682	5.37903	1.09329	267.682	1.41124
	LN		SD	0.54224	5.75961	0.949237	0.533355	0.106555	0.378769	7.86134	117.419	46.9435																lungs	DP1	6.9189	33.6871	44.8731	26.9611	144.676	28.7176	2.89912	15.7003	27.1314	18.5743	120.359	17.0184
																													DP2	106	636.389	64.3444	778.429	1316.19	3.28407	33.4801	252.438	50.2009	311.191	785.38	1.8531
																												LN	Control	1.0127	1.80311	0.231374	0.7	2.8	14.449	0.440192	1.3242	0.106555	0.407496	1.2	12.8232
	germline gamma1 Lungs	germline gamma1 Lungs																											DP1	0.894164	1.22765	0.752472	6.70902	6.62986	3.37784	0.594692	0.710553	0.378769	1.80374	3.99939	1.50634
		germline gamma1 Lungs	group																										DP2	92.3982	29.6912	73.7725	327.438	28.9658	31.2036	36.7083	12.8011	46.9435	98.9253	15.7892	16.4551
			Data	0.012632	387.829	69.5161	24.7744	87.3827	682.306	188.568	958.928	2480.84
				0.0170924	119.465	0.260486	2224.52	1600.47	7.05808	31.2495	1969.63	372.975
				0.925335	315.015	110.989	219.116	92.2663	7.08258	13.3839	2335.37	54.6835
				4.64049	89.8394	21.1785	1639.77	251.822	151.616	99.7938	500.808	444.005
				0.0114721	69.5161	97.7393	17.0805	549.463	0.237216	19.2261	9086.75	145.335
				0.392984	528.602	0.867103	602.084	42.0549	19.7568	315.507	34.513	4399.33
	germ g1		mean	1	251.711	50.0918	787.89	437.242	144.676	111.288	2481	1316.19
	Lungs		SD	0.812092	83.7789	21.9598	415.16	267.682	120.359	53.6742	1495.93	785.38
	germline gamma1 LN	germline gamma1 LN
		germline gamma1 LN	group
			Data	0.0366739	24.0181	2.84001	6.89666	0.103054	0.11525	2.20281	0.267817	28.327
				0.0560943	4.2307	8.54984	3.63233	0.259876	0.178117	23.6325	0.0442708	2.95773
				1.7182	4.41036	16.0004	2.10074	0.0906152	0.438498	2.12064	0.378554	19.3497
				0.14318	10.4534	15.4901	15.9546	1.31395	13.4591	334.353	0.428953	89.3865
				0.549388	0.324167	8.21904	5.75332	0.346493	18.9584	19.0569	0.985787	4.80832
	germ g1		mean	0.500707	8.68735	10.2199	6.86752	0.422797	6.62986	76.2731	0.421076	28.9658
	LN		SD	0.317678	4.15352	2.46997	2.41449	0.227536	3.99939	64.5529	0.155649	15.7892
	postswitch e Lungs	postswitch e Lungs
		postswitch e Lungs	group
			Data	0.0415489	11.6661	2.09108	47.6944	0.276579	0.803432	174.673	614.09	358.291
				0.49801	9.08979	0.0626843	8.36431	1.0566	13.635	7.23673	2163.29	777.286
				0.263243	9.4758	0.0574901	210.916	0.752231	88.8454	3.09943	115.977	216.912
				4.46682	5.40482	0.402333	16.9622	5.55083	4.56067	4.24098	924.679	1761.23
	post e		mean	1.3174	8.90912	0.653396	70.9843	1.90906	26.9611	47.3126	954.51	778.429
	Lungs		SD	0.941011	1.15942	0.433902	42.3229	1.09329	18.5743	37.913	389.279	311.191
	postswitch e LN	postswitch e LN
		postswitch e LN	group
			Data	0.00401987	168.49	10.5825	24.1904	0.0848361	6.19653	1.88813	4.42977	97.1212
				0.316585	14.6388	0.622594	235.791	0.0397297	0.384514	8.35466	2.42857	313.761
				1.50667	30.9392	0.184624	447.692	0.0720116	5.90106	2.154	5.74943	612.936
				3.13044	0.526276	3.74863	33.0451	0.0348273	6.92284	206.053	2.37961	147.485
				0.0787851	7.04385	50.4353	144.222	0.163954	7.87	69.6392	0.376948	211.178
				0.963505	0.920272	12.9729	177.297	0.0759589	12.9792	65.3378	10.8179	582.144
	post e		mean	1	37.0931	13.0911	177.039	0.078553	6.70902	58.9044	4.36371	327.438
	LN		SD	0.532148	29.1759	8.4944	69.6998	0.0207496	1.80374	35.0587	1.63612	98.9253
	postswitch gamma1 Lungs	postswitch gamma1 Lungs
		postswitch gamma1 Lungs	group
			Data	0.248012	10.7665	0.96492	11.0042	4.85167	2.36769	90.4065	6.77061	10.2568
				0.580791	1.09314	3.08118	494.039	9.77083	3.13504	439.993	0.856769	6.43958
				0.242945	79.8091	7.10856	194.653	2.84266	100.669	23.5557	37.322	0.237676
				0.77998	0.125402	47.5277	0.489195	6.99085	40.9974	92.0752	0.430382	1.92982
				2.60897	0.917159	20.0911	0.0444548	0.70337	6.74343	40.219	64.9562	0.249794
				1.5393	5.53115	2.25958	0.522328	4.66995	18.3928	555.293	6.05996	0.59073
	post g1		mean	1	16.3737	13.5055	116.792	4.97156	28.7176	206.924	19.3993	3.28407
	Lungs		SD	0.411219	13.9889	8.07086	89.3401	1.41124	17.0184	102.555	11.7058	1.8531
	postswitch gamma1 Lungs	postswitch gamma1 LN
		postswitch gamma1 Lungs	group
			Data	1.58282	0.070715	6.61361	0.472436	72.9174	0.48407	30.1972	9.7682	25.8129
				1.25233	0.0030398	12.451	0.675423	1.0928	2.81511	14.3574	139.109	55.7103
				0.194664	0.716079	10.0951	1.23375	2.88026	0.58434	68.4814	281.967	3.04727
				0.517058	0.00107473	3.53102	34.9735	6.81721	4.32647	121.987	59.8974	93.8544
				1.2043	0.92168	18.5851	179.191	2.04258	2.4592	45.4003	9.01208	2.33723
				1.24883	0.355298	10.3596	43.2401	0.943563	9.59784	41.5786	16.5687	6.45928
	post g1		mean	1	0.344648	10.2726	43.2976	14.449	3.37784	53.667	86.0537	31.2036
	LN		SD	0.235281	0.176418	2.30003	30.9012	12.8232	1.50634	16.9381	48.2737	16.4551

## Sheet: Figure 3
		germline e	group	0 ug OVA	0,3 ug OVA	30 ug OVA	0 ug OVA+ 150 ug SRM1650B	0,3 ug OVA+ 150 ug SRM1650B	30 ug OVA + 150 ug SRM1650B	0 ug OVA+ 150ug SRM2786	0,3 ug OVA+ 150ug SRM2786	30 ug OVA+ 150ug SRM2786
			Data	0.0282091	0.506886	1.01946	14.1018	12.9763	9.75094	2.63705	95.1441	147.684									0.0282090726015526	14.1017822787489	0.506886168152555	12.9762859047054	1.01946030836461	9.7509414075991	2.63705152429131	95.1441437443564	147.684261498872
				0.102098	0.77798	1.02655	0.459395	40.9016	9.95026	0.338531	2.74996	65.6436									0.102097897890194	0.459394537263493	0.77798034190563	40.9015569762729	1.02655121557028	9.95025639814586	0.338530545928519	2.74995890367954	65.6435501451988
				2.02181	0.686059	4.668	1.16821	3.28936	1.32208	0.171354	9.42227	164.853									2.02180609009217	1.16820695395473	0.686058766697736	3.28935702638545	4.66800338302542	1.32207645228394	0.171353840894901	9.42226639824318	164.853301421774
				0.481333	0.0121909	8.61148	0.405509	1.19566	17.2292	0.285586	3.47789	41.2133									0.481333003778925	0.405508934522044	0.0121908936122906	1.19565867900473	8.61148120282351	17.2292045981811	0.285586222057371	3.47788922875966	41.2133253554435
				2.19285	0.928247	5.87583	6.16699	0.797085	1.41697	0.686285	14.7811	334.633									2.19284768588018	6.16699473150973	0.928247144697851	0.797085067484804	5.87582626325646	1.41696645700206	0.686285203939618	14.7811059117387	334.63338460096
				1.17371	0.101162	2.00324	8.81341	2.19509	1.84396	0.130664	0.268239	15.1227									1.17370624975698	8.81340647990086	0.101161602525673	2.19508852975771	2.00324332610305	1.84395775825404	0.130663930887374	0.268238780334923	15.1226857152662
		germline e	mean	1	0.502087	3.86743	5.18588	10.2258	6.9189	0.708245	20.9739	128.192
		lungs	SD	0.424308	0.166122	1.36635	2.48519	7.00656	2.89912	0.430888	16.3906	52.2929
		t-test	0.3		0.114241	0.0276594		0.258026	0.335816		0.111876	0.0221429
			30		0.0276594	0.0241326		0.335816	0.309125		0.0221429	0.035392
		germline e	Data	0.000770418	0.119322	0.554208	0.314728	2.13605	1.18758	1.46854	2.85671	75.5387									0.000770418431914804	0.314727695532092	0.119321823851841	2.13605411005019	0.554207876781032	1.18758207588282	1.46854171430319	2.85671064502146	75.5387175111422
				3.88316	0.0847052	2.79516	0.119322	78.1368	3.45319	103.969	0.944443	126.197									3.88316409891878	0.119321823851841	0.0847052158210953	78.1367768259736	2.79515800824998	3.45319029710661	103.969046630749	0.94444322421512	126.196518775698
				0.09625	0.0443424	0.243658	0.711004	21.5858	0.119736	13.1035	8.36258	229.422									0.0962499659054417	0.711004127403137	0.0443424374841133	21.5857558521428	0.243658058028455	0.11973607921595	13.1035442477877	8.36257999016693	229.421780405445
				0.0160964	1.14277	0.22082	0.185299	33.4533	0.565477	37.2739	5.38478	6.50539									0.016096431210767	0.185299364658623	1.14277395702027	33.4533335852064	0.220819624413035	0.565477341048994	37.2739449388325	5.38477776228864	6.50538521548947
				1.6344	0.0890532	0.794013	1.7697	2.96019	0.0235673	160.263	4.69091	102.578									1.63440253041562	1.76970378527397	0.0890532060055199	2.960189863337	0.794012910239827	0.0235672925624598	160.263235887116	4.69090546537905	102.577589103147
				0.369317	0.276255	1.46832	1.31777	27.6255	0.0154315	3.88514	0.525873	14.1493									0.369316555117481	1.31777285117108	0.276255223768529	27.6255223768529	1.46831695505041	0.0154315387347224	3.88514013883919	0.52587255772774	14.1493315548365
		germline e	mean	1	0.292742	1.0127	0.736305	27.6496	0.894164	53.3272	3.79421	92.3982
		LN	SD	0.688605	0.189337	0.440192	0.300713	12.4359	0.594692	28.9384	1.32261	36.7083
					0.182364	0.485827		0.0333318	0.421011		0.0605484	0.186758
					0.485827	0.101249		0.421011	0.0291998		0.186758	0.0216008
		Circular mu-epsilon	Data	0.132203	0.2467	0.449317	286.19	23.4633	29.2317	82.9699	1754.66	1361.51											0.132203451123483	286.19045450137	0.246700362986468	23.4632874610843	0.4493169582521	29.2317066185529	82.9698808290831	1754.66333076379	1361.5061245744
				0.0416896	0.0407427	4.18142	4.66162	41.7587	5.62941	60.7011	513.782	184.605											0.0416896116541721	4.66162109214432	0.0407426845501487	41.7587470723779	4.1814167546674	5.6294098139719	60.7010679283542	513.782067477255	184.605326873589
				1.95997	0.696165	1.02808	65.8372	66.7563	0.208892	188.445	110.178	1312.87											1.95997023282763	65.8372304897201	0.696165443398457	66.7562839781729	1.02807617865422	0.208892375916926	188.445327964864	110.177845872975	1312.87100290398
				1.06144	0.313402	2.59493	125.157	1.51659	87.4151	702.548	878.445	51.5167											1.06143551510259	125.156876643745	0.313402268018515	1.51659066035459	2.59493104447381	87.4150833771063	702.548440790192	878.445061042711	51.5166566943044
				2.78144	0.995014	4.06551	531.449	0.0631896	14.3784	541.406	96.9594	418.292											2.7814395348632	531.448747225854	0.995014389437528	0.0631896350356136	4.06550822188083	14.3784050245099	541.405598325247	96.9593810674407	418.2917307512
				0.0232617	0.334675	1.24467	4.63105	1.11371	65.2592	64.5298	416.142	489.541											0.0232616544289283	4.6310463753365	0.334674780010354	1.11371274138306	1.24466592282265	65.2592155283713	64.529779403295	416.141594150337	489.541296104064
		mu-e	mean	1	0.437783	2.26065	169.654	22.4453	33.6871	273.433	628.362	636.389
		lungs	SD	0.517714	0.154328	0.71682	91.8579	12.1958	15.7003	124.416	278.091	252.438
					0.0818359	0.0624725		0.0796629	0.0913189		0.141039	0.141908
					0.0624725	0.019258		0.0913189	0.326949		0.141908	0.489449
		Circular mu-epsilon	Data	0.896471	18.4376	0.0393606	4.3389	5.26827	0.337375	105.735	6.70221	84.9811											0.896470616030385	4.33889658622216	18.4375547301777	5.26826603891008	0.0393606398036017	0.337375142320512	105.735003429829	6.70220969689751	84.981057200035
				0.551576	7.03582	0.0582422	11.8165	177.58	0.981002	14.6206	8.49999	19.8462											0.55157578879453	11.8164530306222	7.03582020929454	177.580357517824	0.058242177119931	0.981002148487383	14.620647182449	8.49998901793608	19.8462240249068
				0	0.186942	0.250927	15.9704	12.8378	4.35396	283.59	12.1157	29.0245											0	15.9703962239202	0.186941560251776	12.837818827159	0.250926832684398	4.35396014397827	283.590463939681	12.1157499651494	29.0244904868274
				2.8801	1.88861	2.29315	98.178	70.3382	0.334963	91.9287	82.3589	21.4594											2.88010047496548	98.1780223675153	1.88861443360967	70.338247733455	2.29314598388351	0.334962660301205	91.9286985026227	82.3589047623379	21.4593857490946
				1.25218	2.74599	0.571303	164.447	15.4264	1.24549	6.86709	2.11919	21.9343											1.25218284099473	164.446646077738	2.74599348228292	15.4263859000088	0.571303075370485	1.24548802996173	6.86708636027553	2.11919123417444	21.9343445556363
				0.41967	5.02273	7.60567	79.1626	55.25	0.113141	360.592	168.873	0.901561											0.419670279214875	79.1625685127111	5.0227310002554	55.2500410028094	7.60567130647617	0.113141049799874	360.59228074601	168.872596753646	0.901560841726879
		mu-e	mean	1	5.88628	1.80311	62.3188	56.1169	1.22765	143.889	46.7781	29.6912
		LN	SD	0.452942	2.94729	1.3242	28.277	28.9806	0.710553	65.0371	29.9075	12.8011
					0.0692543	0.27985		0.443052	0.0329173		0.044576	0.0664054
					0.27985	0.126107		0.0329173	0.0473597		0.0664054	0.323808
		Circular mu-epsilon	Data	0.00401463	3.83569	10.0525	5.57698	11.4002	6.1453	54.9992	5.04789	92.3027											0.00401463488148843	5.57698155862997	3.83568567644485	11.4001904156255	10.0525144193747	6.14530451060388	54.9991780735908	5.04788846705351	92.3026634367947
				1.29638	0.0997516	32.1451	0.56624	12.6036	7.68787	5.88892	36.6743	5.1284											1.29637625451915	0.566239579428966	0.0997516489590162	12.6035893668838	32.1450756203291	7.68786694276958	5.88891649890199	36.6742916860183	5.12840235509365
				0.000245788	1.21819	3.88955	1.29189	9.36168	104.292	74.0917	2.00696	0.402474											0.000245788316845225	1.29189113340232	1.21819094209226	9.36168197055789	3.88955039962494	104.291986581957	74.0916690584435	2.00696120108303	0.402473880424253
				0.425802	12.3095	13.9173	0.499821	47.1598	139.535	270.703	110.178	2.28047											0.42580241383331	0.499821373380308	12.3094849308713	47.1597609548001	13.9173347787777	139.535122591384	270.702799162624	110.177845872975	2.28047356846955
				4.27074	2.50491	31.6052	0.810109	62.878	1.40913	5.36478	27.4514	3.9967											4.27073535288381	0.810108841967067	2.50491201828171	62.878046892972	31.605165605274	1.40913410671646	5.36477560669846	27.4514081575847	3.99669919270212
				0.00282556	0.0264324	9.676	2.03762	17.316	10.1694	138.823	19.074	281.955											0.00282555556539225	2.03761904399574	0.0264324060185795	17.3159534833415	9.67600370412041	10.1694150978261	138.823235916805	19.0740240586859	281.955476500464
		G1-e	mean	1	3.33241	16.8809	1.79711	26.7865	44.8731	91.6451	33.4054	64.3444
		Lungs	SD	0.74971	2.0688	5.37903	0.865028	10.0796	27.1314	44.9706	17.7851	50.2009
					0.156128	0.00760739		0.0239713	0.073494		0.0596718	0.323947
					0.00760739	0.0287972		0.073494	0.254695		0.323947	0.292252
		Circular gamma1-epsilon	Data	0.00327528	4.05818	0.589026	0.750958	3.00181	0.631096	45.1749	193.584	267.24											0.00327527774812012	0.750958243727491	4.05818031695546	3.0018106355917	0.589025603314791	0.631095549196869	45.174929607868	193.584156650866	267.239686819124
				0.0606942	6.58062	0.185673	1.26818	1.45023	0.390928	6.8803	1.40643	125.914											0.0606942142104482	1.26818134904858	6.58061940855268	1.45022759192241	0.185672617300705	0.390928022826003	6.8803045564466	1.40643415278367	125.914241131889
				0.102297	1.52714	0.000505792	24.1815	0.210346	0.313291	11.2928	43.5182	7.59116											0.102296803440924	24.1815190378267	1.5271406806262	0.210345516080663	0.000505792396474339	0.313291374416681	11.2928091817754	43.5182084801335	7.59116185165074
				2.55059	0.441606	0.454022	29.8743	2.11766	2.40401	13.8743	432.423	9.91412											2.55059346731712	29.8742992933708	0.441606395110352	2.11765583480275	0.454021640752695	2.40401225552287	13.8743409682458	432.423010812356	9.91411712907416
				2.4981	3.02873	0.0254354	5.73913	3.60708	0.0221584	39.4665	635.756	16.9943											2.49810301278301	5.73913364279395	3.02873318649667	3.60708387358009	0.0254354345448644	0.0221584085826408	39.4665299352344	635.755658366666	16.9943188596213
				0.785037	2.93611	0.133585	2.31606	2.34889	0.753345	4.11368	0.181355	14.9816											0.785037224500378	2.31605930670295	2.93610767126307	2.34888613701045	0.133585281961241	0.753344656502087	4.11367779406502	0.181354517126333	14.9816451757093
		g1-e	mean	1	3.0954	0.231374	10.6884	2.12267	0.752472	20.1338	217.811	73.7725
		LN	SD	0.54224	0.949237	0.106555	5.75961	0.533355	0.378769	7.86134	117.419	46.9435
					0.0720649	0.0955388		0.0907462	0.0533772		0.0567677	0.116411
					0.0955388	0.0110174		0.0533772	0.0363957		0.116411	0.148459
			Data	0.012632	69.5161	87.3827	387.829	24.7744	682.306	188.568	958.928	2480.84											0.012632029856687	387.828665480728	69.5161187746331	24.774381696429	87.3826910445618	682.306254412709	188.567910975189	958.927827015024	2480.84117482092
		germline gamma1 Lungs		0.0170924	0.260486	1600.47	119.465	2224.52	7.05808	31.2495	1969.63	372.975											0.0170923561268248	119.465094024581	0.260485618965855	2224.51580078826	1600.46524250944	7.05807925751005	31.2495329963584	1969.63226722047	372.974716734084
				0.925335	110.989	92.2663	315.015	219.116	7.08258	13.3839	2335.37	54.6835											0.925334678016292	315.014762912362	110.989210887134	219.116433909566	92.2662701049033	7.08258313365226	13.3839011338682	2335.37303398752	54.6834901829141
				4.64049	21.1785	251.822	89.8394	1639.77	151.616	99.7938	500.808	444.005											4.64048511030821	89.8393528733293	21.1785426581369	1639.7675842399	251.822217491388	151.615730137228	99.7938126122432	500.808390331706	444.004972757797
				0.0114721	97.7393	549.463	69.5161	17.0805	0.237216	19.2261	9086.75	145.335											0.0114721184132686	69.5161187746331	97.7393371793231	17.0804683656569	549.46340910987	0.237216395276739	19.2260510768909	9086.74560274443	145.334516098259
				0.392984	0.867103	42.0549	528.602	602.084	19.7568	315.507	34.513	4399.33											0.392983707278717	528.60184047913	0.867103210055732	602.084035994235	42.0549131764283	19.7567759341234	315.507354356375	34.5130096904978	43993.2675353199
		germ g1	mean	1	50.0918	437.242	251.711	787.89	144.676	111.288	2481	1316.19
		Lungs	SD	0.812092	21.9598	267.682	83.7789	415.16	120.359	53.6742	1495.93	785.38
					0.0299271	0.0675274		0.128232	0.196309		0.0752426	0.0660581
					0.0675274	0.0932893		0.196309	0.0960989		0.0660581	0.27666
		germline gamma1 LN	Data	0.0366739	2.84001	0.103054	24.0181	6.89666	0.11525	2.20281	0.267817	28.327											0.0366738917028817	24.0181480707297	2.84001230010593	6.89665681281527	0.103053574991607	0.115249968220793	2.20281257145478	0.267816622970762	28.3270190666783
				0.0560943	8.54984	0.259876	4.2307	3.63233	0.178117	23.6325	0.0442708	2.95773											0.0560942984893737	4.23070231845908	8.54983855468376	3.63233478248604	0.259876336555921	0.178117006785988	23.6325386616401	0.0442707761350838	2.95773090880541
				1.7182	16.0004	0.0906152	4.41036	2.10074	0.438498	2.12064	0.378554	19.3497											1.71819904821914	4.41036231130475	16.0004343461521	2.10073936144489	0.0906152186114294	0.438497694714551	2.12063592134676	0.378553568255846	19.3496603245516
				0.14318	15.4901	1.31395	10.4534	15.9546	13.4591	334.353	0.428953	89.3865											0.143179532373121	10.4533769847209	15.4901033969827	15.9545628876667	1.31394750179248	13.4590852885758	334.352668523311	0.42895262897051	89.3865079382924
				3.49647	2.11958	0.164137	13.4548	0.631081	0.00122119	14.7893	0.0532101	18.7416											3.49646527710627	13.4547599917155	2.11958041081889	0.63108103684305	0.164137415571567	0.00122118916952355	14.7893096492952	0.0532101205571598	18.7415786736843
				0.549388	8.21904	0.346493	0.324167	5.75332	18.9584	19.0569	0.985787	4.80832											0.549387952109219	0.324166813945118	8.21903537995405	5.75332476596783	0.346492775737316	18.9583742026282	19.0568604259708	0.985787274091225	4.80832448921002
		germ g1	mean	1	8.86983	0.379687	9.48192	5.82812	5.52509	66.0258	0.359765	27.2618
		LN	SD	0.615498	2.65709	0.208903	3.81528	2.44043	3.77566	58.8152	0.15452	14.2447
					0.015324	0.193822		0.192657	0.266327		0.138221	0.198566
					0.193822	0.00748611		0.266327	0.459518		0.198566	0.0469068
		postswitch e Lungs	Data	0.0415489	2.09108	0.276579	11.6661	47.6944	0.803432	174.673	614.09	358.291											0.0415488527060944	11.6660751247026	2.09107870610177	47.6944298367995	0.276579335364709	0.803431741381915	174.673433324386	614.090435587536	358.291085414317
				0.49801	0.0626843	1.0566	9.08979	8.36431	13.635	7.23673	2163.29	777.286											0.498010258083274	9.0897925208267	0.0626842741702665	8.36431482440708	1.05659921847817	13.6350431857586	7.23673395705142	2163.29291569371	777.285586836166
				0.263243	0.0574901	0.752231	9.4758	210.916	88.8454	3.09943	115.977	216.912											0.263242954766922	9.47579747611153	0.0574901001384148	210.916129234739	0.752230842163852	88.8454477600878	3.0994297362642	115.97667986629	216.912238712861
				4.46682	0.402333	5.55083	5.40482	16.9622	4.56067	4.24098	924.679	1761.23											4.46681766298552	5.40482296983282	0.402332825674433	16.9621526163117	5.55082867423264	4.56067499723128	4.2409829362316	924.679011623907	1761.22834000505
				0.706738	1.48481	0.473433	16.7286	479.42	14.6137	11.2943	816.5	15.1845											0.706737988873355	16.7286296488142	1.48481234794151	479.420443819046	0.473433433498629	14.6136774470324	11.2942644351546	816.500051094238	15.1844551080338
				0.0236423	0.104332	0.529229	109.08	36.222	2.37717	73.0649	704.21	9.94914											0.0236422825848362	109.080345486069	0.104331547301612	36.221962018132	0.529228561412684	2.37717376546889	73.0648610088448	704.209816993005	9.94913533899093
		post e	mean	1	0.700455	1.43982	26.9076	133.263	20.8059	45.6016	889.791	523.142
		Lungs	SD	0.767326	0.389875	0.906948	18.0481	82.7326	15.1032	30.6575	305.25	298.793
					0.367549	0.027351		0.121374	0.405582		0.0161161	0.0759038
					0.027351	0.243648		0.405582	0.0913024		0.0759038	0.149815
		postswitch e LN	Data	0.00401987	10.5825	0.0848361	168.49	24.1904	6.19653	1.88813	4.42977	97.1212											0.00401986652877664	168.489998794675	10.5825143616492	24.1904099903242	0.0848361187356277	6.19653066341013	1.88812506124695	4.42976935644744	97.1212082286114
				0.316585	0.622594	0.0397297	14.6388	235.791	0.384514	8.35466	2.42857	313.761											0.316585295169445	14.6388446629634	0.622593886626585	235.790750517775	0.0397297442273071	0.384513805125347	8.35465553282801	2.42856829083888	313.761470132587
				1.50667	0.184624	0.0720116	30.9392	447.692	5.90106	2.154	5.74943	612.936											1.50666984560447	30.9391855828141	0.184624358640725	447.692182394118	0.0720116319508331	5.90106192141528	2.1539954062824	5.74942948198025	612.936054434005
				3.13044	3.74863	0.0348273	0.526276	33.0451	6.92284	206.053	2.37961	147.485											3.13043536954058	0.52627598949749	3.74862969121073	33.0450738741765	0.0348273210960801	6.92283669267797	206.052731854863	2.3796100702241	147.485430260643
				0.0787851	50.4353	0.163954	7.04385	144.222	7.87	69.6392	0.376948	211.178											0.0787851190199227	7.04384574654315	50.4353483112439	144.221666568474	0.163954035349032	7.86999825517737	69.6391598266744	0.376947760610816	211.177944357765
				0.963505	12.9729	0.0759589	0.920272	177.297	12.9792	65.3378	10.8179	582.144											0.963504504136803	0.920272331331204	12.9729270910623	177.296670244518	0.0759589259265823	12.9791877474419	65.337807174757	10.8179497589706	582.14392682756
		post e	mean	1	13.0911	0.078553	37.0931	177.039	6.70902	58.9044	4.36371	327.438
		LN	SD	0.532148	8.4944	0.0207496	29.1759	69.6998	1.80374	35.0587	1.63612	98.9253
					0.0953973	0.0615998		0.0639962	0.15551		0.0764741	0.0257048
					0.0615998	0.0769937		0.15551	0.0224735		0.0257048	0.00766376
		postswitch gamma1 Lungs	Data	0.248012	0.96492	4.85167	10.7665	11.0042	2.36769	90.4065	6.77061	10.2568											0.248011952635886	10.7665308225469	0.964920210994705	11.0042054292616	4.85167044226708	2.36769222223595	90.4064754800229	6.77061091857038	10.2568047101873
				0.580791	3.08118	9.77083	1.09314	494.039	3.13504	439.993	0.856769	6.43958											0.580791255833279	1.09314255763212	3.08117698959997	494.039148029289	9.77083295777394	3.13503501469205	439.993424588726	0.856769204474505	6.43958208678805
				0.242945	7.10856	2.84266	79.8091	194.653	100.669	23.5557	37.322	0.237676											0.242944894149963	79.8091114251735	7.10856374033054	194.652870147362	2.84265964511964	100.66941017061	23.5556659956079	37.3219697764599	0.237675745294206
				0.77998	47.5277	6.99085	0.125402	0.489195	40.9974	92.0752	0.430382	1.92982											0.779980057633998	0.125402127850888	47.5276625983536	0.489194997589539	6.99084907265026	40.9973895044823	92.0751816339903	0.43038221044131	1.92981853319076
				2.60897	20.0911	0.70337	0.917159	0.0444548	6.74343	40.219	64.9562	0.249794											2.60897217250306	0.91715886983868	20.0910569236683	0.0444547551316103	0.703369899760622	6.74342514437754	40.2190151318424	64.9561711683996	0.249793699543882
				1.5393	2.25958	4.66995	5.53115	0.522328	18.3928	555.293	6.05996	0.59073											1.53929966724382	5.53114577511874	2.25958293076575	0.522327649767411	4.66995412412132	18.3927588495701	555.29294366722	6.05996131671504	0.590729910752586
		post g1	mean	1	13.5055	4.97156	16.3737	116.792	28.7176	206.924	19.3993	3.28407
		Lungs	SD	0.411219	8.07086	1.41124	13.9889	89.3401	17.0184	102.555	11.7058	1.8531
					0.0741106	0.024004		0.134441	0.0688185		0.0597306	0.0409318
					0.024004	0.151988		0.0688185	0.167888		0.0409318	0.112768
		postswitch gamma1 Lungs	Data	1.58282	6.61361	72.9174	0.070715	0.472436	0.48407	30.1972	9.7682	25.8129											1.58281625636717	0.0707150057376331	6.61361093694052	0.472436047018479	72.9173866980047	0.484070249825649	30.1971954723951	9.76820449776689	25.812924295029
				1.25233	12.451	1.0928	0.0030398	0.675423	2.81511	14.3574	139.109	55.7103											1.25233244792047	0.00303979753560796	12.4510107058502	0.675422627831287	1.09279711380181	2.81510932804082	14.3573548481546	139.10912347533	55.7102820133627
				0.194664	10.0951	2.88026	0.716079	1.23375	0.58434	68.4814	281.967	3.04727											0.194664378614684	0.716079143082593	10.0950865052351	1.23374585951916	2.88026471067274	0.584340488392561	68.4813708658562	281.966544643478	3.04726731607815
				0.517058	3.53102	6.81721	0.00107473	34.9735	4.32647	121.987	59.8974	93.8544											0.517057923714273	0.00107473072543127	3.53101790096637	34.9735163671807	6.81721144089859	4.32647165887831	121.987456163452	59.8973852817003	93.8543647113183
				1.2043	18.5851	2.04258	0.92168	179.191	2.4592	45.4003	9.01208	2.33723											1.20429676891221	0.921680431054199	18.5850733012896	179.190580358318	2.04258027621941	2.45920320801872	45.4002940499273	9.01208405252378	2.33722559153815
				1.24883	10.3596	0.943563	0.355298	43.2401	9.59784	41.5786	16.5687	6.45928											1.24883222447119	0.355298150536309	10.3596023271902	43.240079278707	0.943562645800511	9.59783746245686	41.5786045657545	16.5687186889183	6.45927979697798
		post g1	mean	1	10.2726	14.449	0.344648	43.2976	3.37784	53.667	86.0537	31.2036
		LN	SD	0.235281	2.30003	12.8232	0.176418	30.9012	1.50634	16.9381	48.2737	16.4551
					0.00318196	0.149706		0.0937846	0.041818		0.252497	0.098807
					0.149706	0.377883		0.041818	0.107581		0.098807	0.151097

## Sheet: Figure 4
	Доза Аг	Стимул	площадь кластеров, % (на 1560 ед. пл. фотографии)							площадь кластеров, %, средняя	площадь кластеров, %, СО
	0	-	0.83	0.13	0	0	0.06	0	0.19	0.172857	0.112824
	0	SRM1650b, 30ug	1.99	0	0.06	0	0.51	1.99		0.758333	0.367164
	0	SRM1650b, 150ug	0.51	0.26	0.32	0	0			0.218	0.0827784
	0	SRM2786, 30ug	0.06	0.13	0	0.58	1.54	1.09	0.06	0.494286	0.229019
	0	SRM2786, 150ug	1.22	0.13	0	2.69	0.96	1.35		1.05833	0.368387
	0.3	-	0	0	0	0.51	0.32	0	0.32	0.164286	0.0809302
	0.3	SRM1650b, 30ug	0	0.13	3.46	0.83	0.19	0.13		0.79	0.50588
	0.3	SRM1650b, 150ug	0.38	1.6	0.13	0	0.64	0.58	0.13	0.494286	0.205188
	0.3	SRM2786, 30ug	0.26	0	0.19	0.06	0			0.102	0.0443617
	0.3	SRM2786, 150ug	2.43	3.08	1.6	1.35	2.24	1.28	1.34	1.90286	0.261412
	30	-	0	0.19	0.19	0	0	0	0	0.0542857	0.0349851
	30	SRM1650b, 30ug	0.45	0.64	0.77	0.38	2.5	0.51	3.3	1.22143	0.443999
	30	SRM1650b, 150ug	1.15	2.31	4.62	6.03	1.28	0.06		2.575	0.864178
	30	SRM2786, 30ug	3.33	2.24	0.19	0.45	1.54	0.38		1.355	0.472677
	30	SRM2786, 150ug	0.71	0.38	1.41	4.1	0.9	2.76	0.64	1.55714	0.518117

## Sheet: CCXL13
						DP1	DP1	DP1	DP2	DP2	DP2
		OVA	0	0.3	30	0	0.3	30	0	0.3	30
	CXCL13 Lungs	group	0 ug OVA	0,3 ug OVA	30 ug OVA	0 ug OVA+ 150 ug SRM1650B	0,3 ug OVA+ 150 ug SRM1650B	30 ug OVA+ 150 ug SRM1650B	0 ug OVA+ 150 ug SRM2786	0,3 ug OVA+ 150 ug SRM2786	30 ug OVA+ 150 ug SRM2786
			66.8934	41.1187	136.243	88.6243	162.887	130.574	149.849	319.402	130.574						PBS	OVA 0.3	OVA 30
			85.2079	171.013	106.198	113.19	65.9486	150.794	96.7498	361.678	150.794				CXCL13	Control	70.1638	103.424	110.431		5.17161	30.4356	20.1669
			58.39	63.4921	181.784	33.6357	62.9252	126.606	128.307	196.901	126.606					DEP1	106.34	127.816	191.459		24.4852	33.5467	34.4414
				33.0688	38.1708	189.909	268.896	345.049	73.5072		345.049					DEP2	112.103	292.66	191.459		12.7274	32.2949	34.4414
				208.428	89.7581		78.4203	204.271			204.271
		mean	70.1638	103.424	110.431	106.34	127.816	191.459	112.103	292.66	191.459
		SD	5.17161	30.4356	20.1669	24.4852	33.5467	34.4414	12.7274	32.2949	34.4414
	CXCL13 Lungs	group	0 ug OVA	0,3 ug OVA	30 ug OVA
			66.8934	241.119	136.243
			75.2079	171.013	106.198
			58.39	63.4921	181.784
				33.0688	38.1708
				208.428	89.7581
		mean	66.8304	143.424	110.431
		SD	3.17324	34.3263	20.1669

## Sheet:  Bcl cytokines
			group	0 ug OVA	0,3 ug OVA	30 ug OVA	0 ug OVA+ 150 ug SRM1650B	0,3 ug OVA+ 150 ug SRM1650B	30 ug OVA+ 150 ug SRM1650B	0 ug OVA+ 150ug SRM2786	0,3 ug OVA+ 150ug SRM2786	30 ug OVA+ 150ug SRM2786
							DP1	DP1	DP1	DP2	DP2	DP2									SD
			OVA	0	0.3	30	0	0.3	30	0	0.3	30				PBS	OVA 0.3	OVA 30
		CD19		0.944359	4.04529	0.00613272	4.84569	3.41893	1.82748	60.1454	1.46503	151.278		CD19	Control	1	1.13016	1.61718		0.172632	0.561528	0.48272
		Lungs		0.93769	0.245292	2.23668	5.8052	3.55354	7.67008	7.08384	12.0366	36.4686			DEP1	7.44683	3.5529	5.6783		1.97177	0.558584	2.63919
				1.00617	0.969345	2.60679	5.96995	5.99962	4.86213	47.1938	3.0605	91.5852			DEP2	29.5065	10.5488	121.017		8.69295	5.10775	24.5448
				1.13713	1.13713	1.16003	4.96959	1.33278	0.842695	35.4476	5.123	91.5852				PBS	OVA 0.3	OVA 30
				1.70156	0.237383	3.24474	5.02073	3.4114	18.7482	26.9384	4.44119	227.368		Bcl6	Control	1	1.12844	215.772		0.495002	0.577774	65.0137
				0.273083	0.14654	0.448696	18.0698	3.60113	0.119229	0.230064	37.1666	127.817			DP1	2.47312	1.57537	1755.14		0.911018	0.994772	394.097
			mean	1	1.13016	1.61718	7.44683	3.5529	5.6783	29.5065	10.5488	121.017			DP2	2.14598	8.01214	79.2178		0.619738	2.71713	36.8084
			SD	0.172632	0.561528	0.48272	1.97177	0.558584	2.63919	8.69295	5.10775	24.5448				PBS	OVA 0.3	OVA 30
														Ebi2	Control	1	0.994469	1.358		0.117442	0.345852	0.416405
															DP1	5.24317	7.18632	4.75719		1.07679	1.5858	2.01779
															DP2	23.156	5.39327	81.2894		8.77212	1.2207	63.0161
																PBS	OVA 0.3	OVA 30
														TNFa	Control	1	0.7	8.55176		0.218688	0.4	2.81778
				0.09501	2.36575	59.4755	0.184806	6.64427	2326.95	0.411378	11.3037	247.547			DP1	10.3195	2.64819	13.6593		1.33796	0.559607	3.84994
		Bcl6		0.479374	0.70918	38.0341	6.42735	0.092412	2468.17	1.24998	1.53878	134.258			DP2	4.53191	11.8893	35.4242		2.50266	2.05454	16.9679
		Lungs		3.54911	0.00866929	239.557	1.62497	0.187404	2010.31	4.28285	19.9394	1.20788
				0.01698	0.00358417	125.599	3.05738	0.202653		3.3678	6.23896	9.36666				PBS	OVA 0.3	OVA 30
				0.789616	3.64144	373.983	0.00775377	2.3251		3.07617	8.81449	76.053		IFNa1	Control	1	0.565296	1.18382		0.392861	0.0880384	0.568484
				1.06991	0.0420222	457.983	3.53647	0.000390814	215.154	0.487707	0.237571	6.87395			DP1	4.96641	2.36717	20.922		0.343949	0.366594	4.32659
			mean	1	1.12844	215.772	2.47312	1.57537	1755.14	2.14598	8.01214	79.2178			DP2	7.09061	6.77735	9.42211		1.97233	2.43985	3.28736
			SD	0.495002	0.577774	65.0137	0.911018	0.994772	394.097	0.619738	2.71713	36.8084
																	AV				SD
																PBS	OVA 0.3	OVA 30
														il4	Control	1	1.4	4.9		0.678053	0.502016	2.8
															DP1	14.9	51.1	173.189		2.7	2.79546	82.3421
				0.557095	0.17984	0.21948	4.52054	2.37741	2.89817	10.2685	2.4279	8.07133			DP2	1540.32	168.103	296.591		765.386	57.9412	163.303
		Ebi2		0.929703	0.380552	3.17278	2.79309	7.15505	1.17469	5.82896	7.19302	6.52364
		Lungs		0.86305	1.91098	1.9454	5.2354	9.52938	2.03772	21.0848	1.02353	14.4481				PBS	OVA 0.3	OVA 30
				0.977275	0.215272	1.43015	1.81359	7.23215	6.69181	20.5236	4.72145	421.856		il13	Control	1	0.0509943	0.0509943		0.386959	0.0237495	0.0237495
				1.19944	0.977275	1.04797	9.08621	13.7354	14.8039	69.0294	7.63708	10.5671			DP1	0.486572	3.55613	4.03345		0.215937	1.54899	2.77342
				1.47343	2.30289	0.332209	8.01017	3.08859	0.936847	12.2009	9.35663	26.2704			DP2	2.89522	0.360148	6.35424		1.22373	0.177733	3.55166
			mean	1	0.994469	1.358	5.24317	7.18632	4.75719	23.156	5.39327	81.2894
			SD	0.117442	0.345852	0.416405	1.07679	1.5858	2.01779	8.77212	1.2207	63.0161
																PBS	OVA 0.3	OVA 30
														ifng	Control	1	0.385542	0.134912		0.3	0.0730391	0.03
															DP1	0.217507	0.132865	0.305255		0.0810472	0.03	0.0800669
				0.622625	0.105597	0.281484	13.3663	0.68676	9.78941	12.8647	2.57362	105.311			DP2	0.530971	0.184707	0.194213		0.08	0.0712102	0.06
				1.36461	0.762693	14.3134	5.91892	2.90496	1.27145	0.395624	12.4315	4.76036
		Tnfa		0.61983	0.500339	0.221402	10.322	2.89597	15.8075	0.00498104	10.7522	16.2067
		Lungs		0.990595	0.17153	12.8569	6.11161	5.10339	27.0826	13.3086	17.8582	2.90327
				1.96874	1.20412	5.99115	13.8234	1.65155	23.1395	0.610719	16.728	4.40192
				0.433596	0.266123	17.6462	12.375	2.64649	4.86555	0.00685007	10.9925	78.9618
			mean	1	0.501733	8.55176	10.3195	2.64819	13.6593	4.53191	11.8893	35.4242
			SD	0.218688	0.158573	2.81778	1.33796	0.559607	3.84994	2.50266	2.05454	16.9679
				0.438028	0.565447	0.0914801	3.68827	1.12227	11.0592	9.86577	0.683731	3.67686
				0.169124	0.558141	0.100599	5.94073	3.52715	25.7788	0.484124	14.5716	5.59734
		Ifna1		2.9342	0.152512	0.0905107	4.59069	1.96529	23.031	9.00278	2.3235	2.98448
		Lungs		1.01911	0.538055	1.62906	4.91674	2.37074	16.9829	9.6799	7.64232	21.7716
				1.22699	0.765932	1.25384	4.56896	3.48776	8.63823	0.645762	14.3837	3.15273
				0.212547	0.811689	3.93744	6.09304	1.7298	40.0418	12.8653	1.05926	19.3496
			mean	1	0.565296	1.18382	4.96641	2.36717	20.922	7.09061	6.77735	9.42211
			SD	0.392861	0.0880384	0.568484	0.343949	0.366594	4.32659	1.97233	2.43985	3.28736

## Sheet: Figure 5
	CD19 Lungs	group	0 ug OVA	0 ug OVA+ 150 ug SRM1650B	0,3 ug OVA	0,3 ug OVA+ 150 ug SRM1650B	30 ug OVA	30 ug OVA+ 150 ug SRM1650B	0 ug OVA+ 150ug SRM2786	0,3 ug OVA+ 150ug SRM2786	30 ug OVA+ 150ug SRM2786
			0.944359	4.84569	4.04529	3.41893	0.00613272	1.82748	60.1454	1.46503	151.278												0.944359400704445	4.8456858366874	4.04528979291406	3.41892985907649	0.00613272356621029	1.82748444577985	60.1453584325306	1.46502862460629	151.278458286045
			0.93769	5.8052	0.245292	3.55354	2.23668	7.67008	7.08384	12.0366	36.4686												0.937690124251212	5.80519736095974	0.245291875118146	3.55354373163363	2.23668117605821	7.67008100785004	7.08383528863737	12.036641633014	36.4686389695549
			1.00617	5.96995	0.969345	5.99962	2.60679	4.86213	47.1938	3.0605	91.5852												1.00617335152735	5.9699534691445	0.969344518032501	5.99961779322407	2.60679018446907	4.86212952195172	47.1938154234087	3.06049571869376	91.5851674565411
			1.13713	4.96959	1.13713	1.33278	1.16003	0.842695	35.4476	5.123	91.5852												1.13713399412276	4.96958984244308	1.13713399412276	1.33277615399246	1.16003226592641	0.842695065464318	35.4476318303266	5.12300191761655	91.5851674565411
			1.70156	5.02073	0.237383	3.4114	3.24474	18.7482	26.9384	4.44119	227.368												1.70156062594872	5.02072695746449	0.237382575329425	3.41140198236828	3.24473632744211	18.7481845440295	26.9384469313509	4.44118726111935	227.367776295943
			0.273083	18.0698	0.14654	3.60113	0.448696	0.119229	0.230064	37.1666	127.817												0.273082503445511	18.0698080104556	0.146540219266052	3.60112893678003	0.448696234559311	0.119228945685788	0.230064251481534	37.1666292301864	127.817126482185
		mean	1	7.44683	1.13016	3.5529	1.61718	5.6783	29.5065	10.5488	121.017
		SD	0.172632	1.97177	0.561528	0.558584	0.48272	2.63919	8.69295	5.10775	24.5448
	Bcl6 Lungs	group	0 ug OVA	0 ug OVA+ 150 ug SRM1650B	0,3 ug OVA	0,3 ug OVA+ 150 ug SRM1650B	30 ug OVA	30 ug OVA+ 150 ug SRM1650B	0 ug OVA+ 150ug SRM2786	0,3 ug OVA+ 150ug SRM2786	30 ug OVA+ 150ug SRM2786
			0.09501	0.184806	2.36575	6.64427	59.4755	2326.95	0.411378	11.3037	247.547												0.0950100136287136	0.184805577278945	2.36574617112773	6.64426732492049	59.4754915566274	2326.94820840535	0.411377903631319	11.3036628799421	247.546568104437
			0.479374	6.42735	0.70918	0.092412	38.0341	2468.17	1.24998	1.53878	134.258												0.479373939216035	6.42734710013012	0.709179817935614	0.0924119598096771	38.034148070157	2468.16543945429	1.24998131985434	1.53877520876599	134.258419544429
			3.54911	1.62497	0.00866929	0.187404	239.557	2010.31	4.28285	19.9394	1.20788												3.54911008751217	1.62497109958046	0.00866928942940011	0.187403965389995	239.55670526119	2010.30958086116	4.28284836283781	19.9393560314067	1.2078750271813
			0.01698	3.05738	0.00358417	0.202653	125.599	1.8998	3.3678	6.23896	9.36666												0.0169800287819722	3.05737876082674	0.00358417316233982	0.202652555771764	125.598827479168	1.89979704507661	3.36780313902016	6.23895639945108	9.36666485350989
			0.789616	0.00775377	3.64144	2.3251	373.983	0.645829	3.07617	8.81449	76.053												0.789616140500995	0.00775376902221785	3.64144052189289	2.32510406791389	373.982604089458	0.645828666786214	3.07616817230254	8.81448918794916	76.0530419547636
			1.06991	3.53647	0.0420222	0.000390814	457.983	215.154	0.487707	0.237571	6.87395												1.06990979036012	3.53647249622169	0.0420222244489867	0.00039081373992595	457.982990203645	215.153632136489	0.487706873336223	0.237570783431589	6.87394805239373
		mean	1	2.47312	1.12844	1.57537	215.772	1170.52	2.14598	8.01214	79.2178
		SD	0.495002	0.911018	0.577774	0.994772	65.0137	458.252	0.619738	2.71713	36.8084
	Ebi2 Lungs	group	0 ug OVA	0 ug OVA+ 150 ug SRM1650B	0,3 ug OVA	0,3 ug OVA+ 150 ug SRM1650B	30 ug OVA	30 ug OVA+ 150 ug SRM1650B	0 ug OVA+ 150ug SRM2786	0,3 ug OVA+ 150ug SRM2786	30 ug OVA+ 150ug SRM2786
			0.557095	4.52054	0.17984	2.37741	0.21948	2.89817	10.2685	2.4279	8.07133												0.55709510053797	4.52053874317599	0.179840147125622	2.37740876600735	0.219479719904408	2.89816544193585	10.268545563597	2.42789675836225	8.07133083518922
			0.929703	2.79309	0.380552	7.15505	3.17278	1.17469	5.82896	7.19302	6.52364												0.929703256352423	2.79308761779063	0.380552363789531	7.15504767966703	3.17277735033892	1.17469435702916	5.82895791322291	7.19302260923635	6.52363776897598
			0.86305	5.2354	1.91098	9.52938	1.9454	2.03772	21.0848	1.02353	14.4481												0.86305001749104	5.23540074121978	1.91098294846777	9.52938149735048	1.94540036205418	2.03771609939791	21.0847919401246	1.02353232287072	14.448115435811
			0.977275	1.81359	0.215272	7.23215	1.43015	6.69181	20.5236	4.72145	421.856												0.977274805027692	1.81358600417741	0.215272049409242	7.23215046244229	1.43014747161413	6.69180681159371	20.5235526059701	4.7214521110458	421.855888494532
			1.19944	9.08621	0.977275	13.7354	1.04797	14.8039	69.0294	7.63708	10.5671												1.19944182472433	9.0862104757805	0.977274805027692	13.7353553916573	1.0479729687396	14.8038922735557	69.0293628360728	7.63707725407393	10.5670687409483
			1.47343	8.01017	2.30289	3.08859	0.332209	0.936847	12.2009	9.35663	26.2704												1.47343499586654	8.01017463153226	2.30289335342457	3.08858833607898	0.332208591022424	0.936847057861705	12.2009465697883	9.35663393207489	26.2704366824031
		mean	1	5.24317	0.994469	7.18632	1.358	4.75719	23.156	5.39327	81.2894
		SD	0.117442	1.07679	0.345852	1.5858	0.416405	2.01779	8.77212	1.2207	63.0161
	Tnfa Lungs	group	0 ug OVA	0 ug OVA+ 150 ug SRM1650B	0,3 ug OVA	0,3 ug OVA+ 150 ug SRM1650B	30 ug OVA	30 ug OVA+ 150 ug SRM1650B	0 ug OVA+ 150ug SRM2786	0,3 ug OVA+ 150ug SRM2786	30 ug OVA+ 150ug SRM2786
			0.622625	13.3663	0.105597	0.68676	0.281484	9.78941	12.8647	2.57362	105.311												0.622625456059913	13.3663059471973	0.105597293688463	0.686760140508018	0.281483958565999	9.78941316001763	12.864690807157	2.5736246876533	105.310931177605
			1.36461	5.91892	0.762693	2.90496	14.3134	1.27145	0.395624	12.4315	4.76036												1.36461491014364	5.91891583319346	0.762692980430441	2.90496394707128	14.3134100696898	1.27144707628963	0.395623994411	12.4314865660626	4.7603561249082
			0.61983	10.322	0.500339	2.89597	0.221402	15.8075	0.00498104	10.7522	16.2067												0.619830367382551	10.3219888586859	0.500339064892637	2.89596777361386	0.221401630820415	15.8074825222075	0.00498104317191515	10.7522117915123	16.2066931612178
			0.990595	6.11161	0.17153	5.10339	12.8569	27.0826	13.3086	17.8582	2.90327												0.990594714531492	6.11161111902836	0.171530259645255	5.10339246658372	12.8569486246399	27.0825845725721	13.3086158482473	17.8582020084633	2.90326503688919
			1.96874	13.8234	1.20412	1.65155	5.99115	23.1395	0.610719	16.728	4.40192												1.96873847374675	13.8233654889623	1.2041171409613	1.65154978020921	5.99115039287776	23.1395485769711	0.610719364244946	16.7280182439683	4.40191591746805
			0.433596	12.375	0.266123	2.64649	17.6462	4.86555	0.00685007	10.9925	78.9618												0.433596078135652	12.3749723733544	0.266123238111585	2.64649316750749	17.6461669598698	4.86555455317802	0.00685006884107188	10.9925306274962	78.9618110332216
		mean	1	10.3195	0.501733	2.64819	8.55176	13.6593	4.53191	11.8893	35.4242
		SD	0.218688	1.33796	0.158573	0.559607	2.81778	3.84994	2.50266	2.05454	16.9679
	Ifna1 Lungs	group	0 ug OVA	0 ug OVA+ 150 ug SRM1650B	0,3 ug OVA	0,3 ug OVA+ 150 ug SRM1650B	30 ug OVA	30 ug OVA+ 150 ug SRM1650B	0 ug OVA+ 150ug SRM2786	0,3 ug OVA+ 150ug SRM2786	30 ug OVA+ 150ug SRM2786
			0.438028	3.68827	0.565447	1.12227	0.0914801	11.0592	9.86577	0.683731	3.67686												0.438027744505179	3.68827157784915	0.565447298418144	1.12227323630137	0.0914800802102185	11.0592209313166	9.86576503873534	0.683730553778305	3.67685554591875
			0.169124	5.94073	0.558141	3.52715	0.100599	25.7788	0.484124	14.5716	5.59734												0.169123534154637	5.94073303385214	0.558141357209326	3.5271465077677	0.100598916952807	25.7787823517555	0.484123918205941	14.5715679092774	5.59734497694534
			2.9342	4.59069	0.152512	1.96529	0.0905107	23.031	9.00278	2.3235	2.98448												2.93419817088124	4.59068612278652	0.152511575905353	1.96528862132734	0.0905107155251173	23.0309802638046	9.002780951467	2.32349939559758	2.98448257370656
			1.01911	4.91674	0.538055	2.37074	1.62906	16.9829	9.6799	7.64232	21.7716												1.01911330880466	4.91674278781461	0.538055425037094	2.37074411133337	1.62905734632977	16.9829009592721	9.67990219359942	7.64232374864784	21.7716473555841
			1.22699	4.56896	0.765932	3.48776	1.25384	8.63823	0.645762	14.3837	3.15273												1.22698976452022	4.56896092582795	0.765932308654199	3.48776318525302	1.25384448206803	8.63823188989494	0.645761999204435	14.3837059929503	3.15273068908368
			0.212547	6.09304	0.811689	1.7298	3.93744	40.0418	12.8653	1.05926	19.3496												0.212547477134073	6.09304351467818	0.811688779615557	1.72980392503946	3.93743872182134	40.0418094900311	12.8653079297891	1.05926447271969	19.3495879060621
		mean	1	4.96641	0.565296	2.36717	1.18382	20.922	7.09061	6.77735	9.42211
		SD	0.392861	0.343949	0.0880384	0.366594	0.568484	4.32659	1.97233	2.43985	3.28736
	МУЛЬТИППЛЕКСЫ SRM1650B
	CXCL13 Lungs	group	0 ug OVA	0 ug OVA+ 150 ug SRM1650B	0,3 ug OVA	0,3 ug OVA+ 150 ug SRM1650B	30 ug OVA	30 ug OVA+ 150 ug SRM1650B
			66.8934	88.6243	41.1187	162.887	136.243	130.574
			85.2079	113.19	171.013	65.9486	106.198	150.794		CXCL13
			58.39	33.6357	63.4921	62.9252	181.784	126.606
				189.909	33.0688	268.896	38.1708	345.049
					208.428	78.4203	89.7581	204.271
		mean	70.1638	106.34	103.424	127.816	110.431	191.459
		SD	5.17161	24.4852	30.4356	33.5467	20.1669	34.4414
	МУЛЬТИППЛЕКСЫ SRM2786
	CXCL13 Lungs	group	0 ug OVA	0 ug OVA+ 150 ug SRM2786	0,3 ug OVA	0,3 ug OVA+ 150 ug SRM2786	30 ug OVA	30 ug OVA+ 150 ug SRM2786
			66.8934	149.849	241.119	319.402	136.243	130.574
			75.2079	96.7498	171.013	361.678	106.198	150.794
			58.39	128.307	63.4921	196.901	181.784	126.606
				73.5072	33.0688	1289.3	38.1708	345.049
					208.428		89.7581	204.271
		mean	66.8304	112.103	143.424	541.821	110.431	191.459
		SD	3.17324	12.7274	34.3263	189.886	20.1669	34.4414

[truncated: 1 more sheets: Cytokines]
