# Supplementary figures and images for: DEPs Induce Local IgE Class Switching Independent of Their Ability to Stimulate iBALT
Source: Preprints.org preprint supplement (doi:10.20944/preprints202207.0222.v1), 2022-07-14

## Lungs

**a**

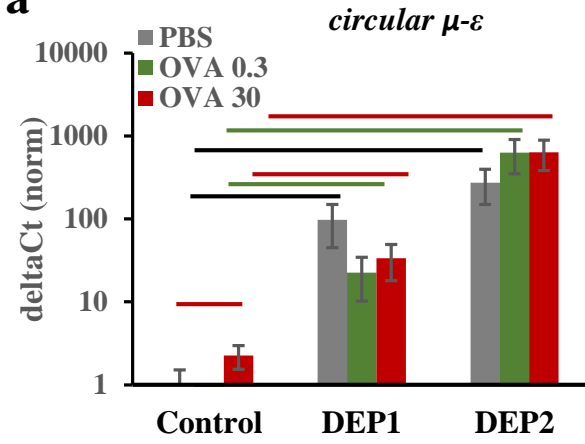

**b**

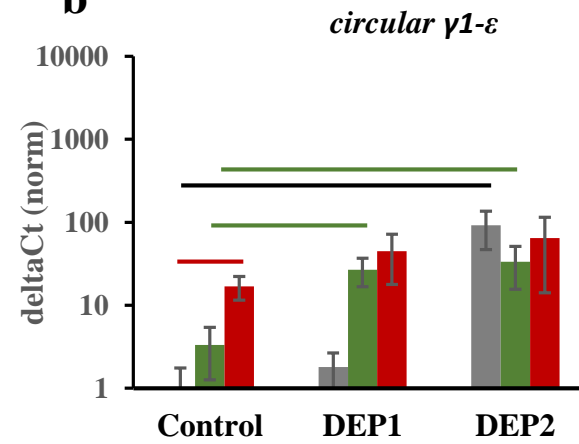

## LN

**c**

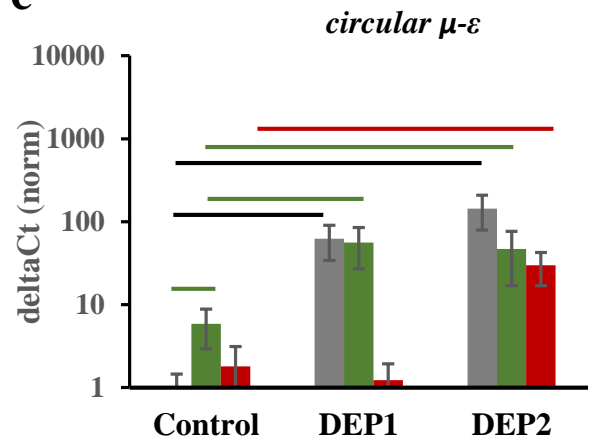

**d**

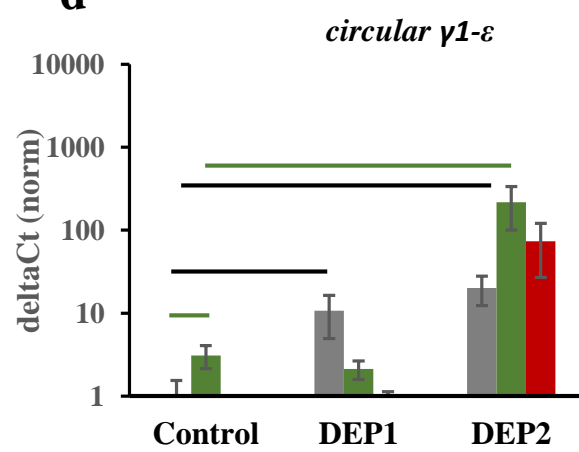

**Figure S5**

Supplement: Supplementary file 1 [file supplementary]

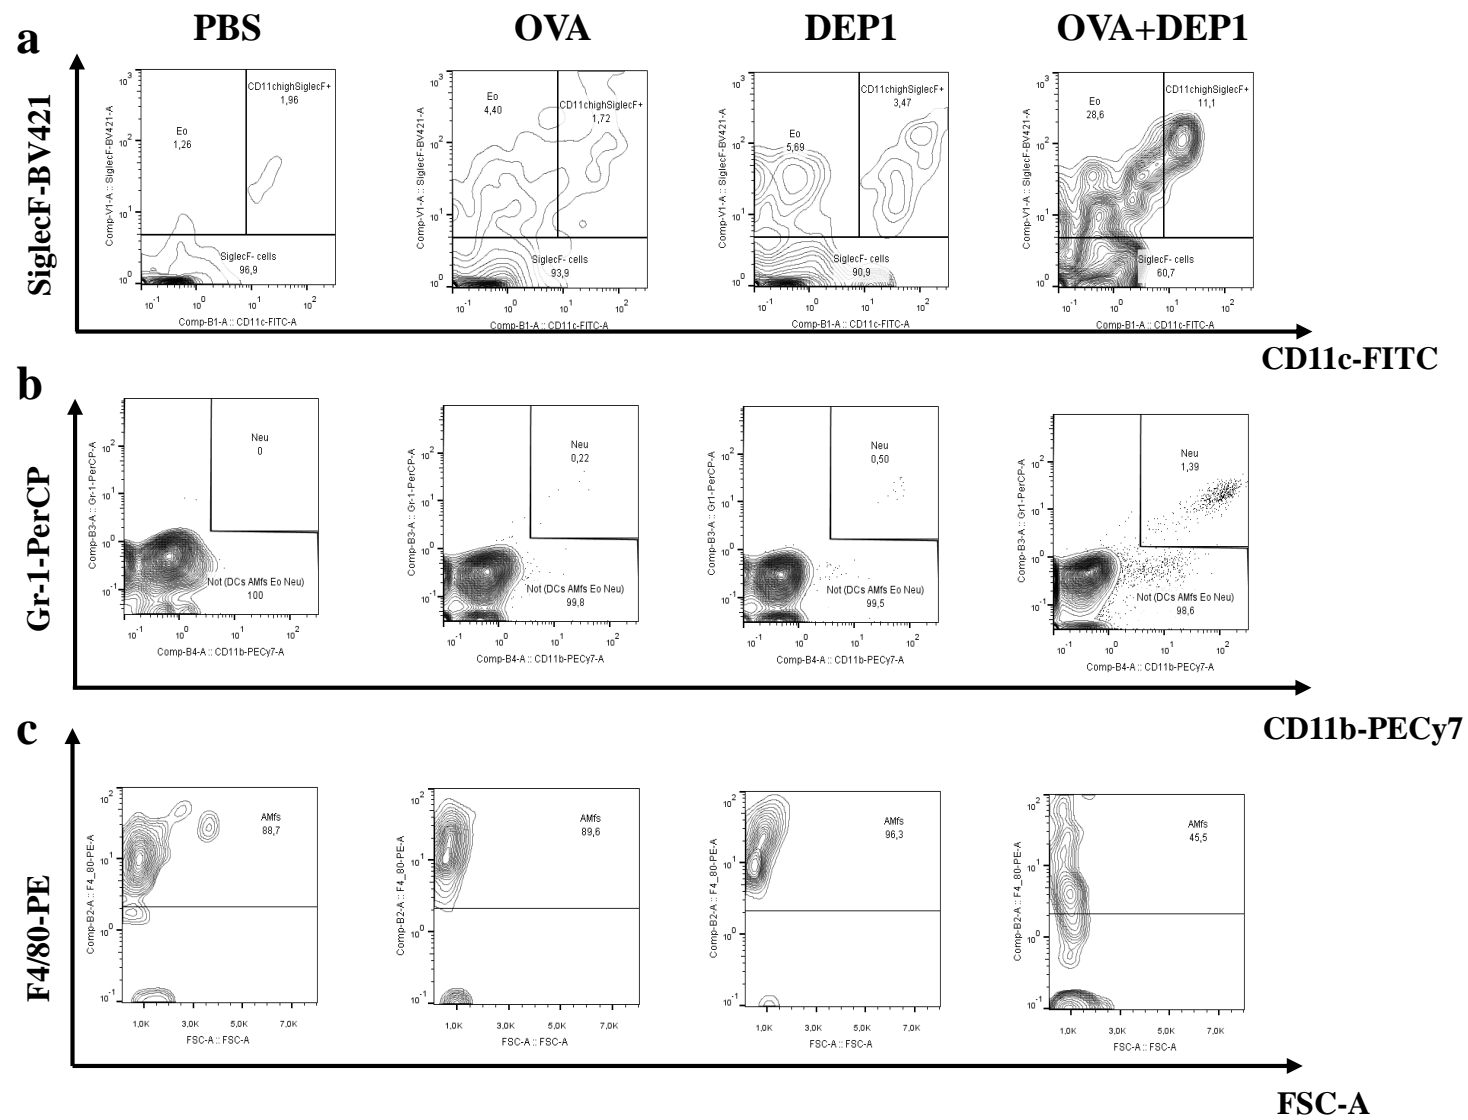

**Figure S4**

Supplement: Supplementary file 2 [file supplementary]

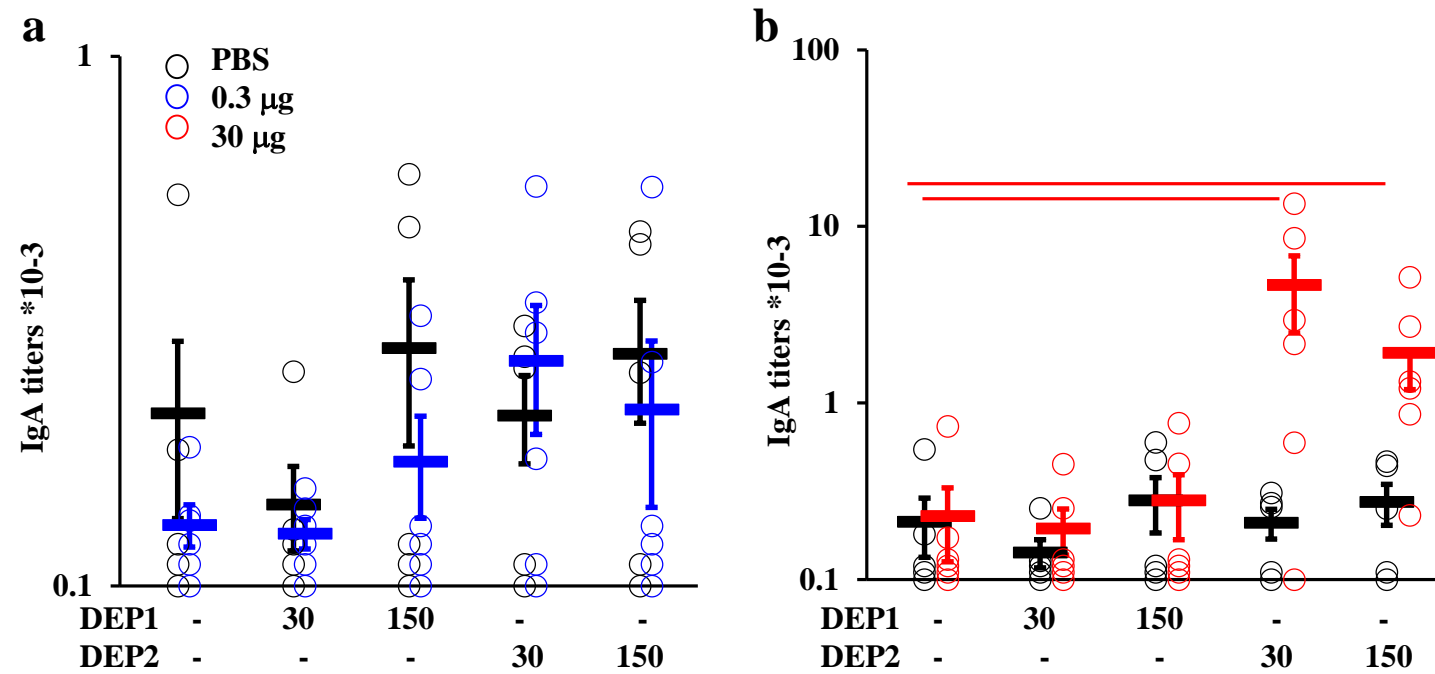

**Figure S2**

Supplement: Supplementary file 3 [file supplementary]

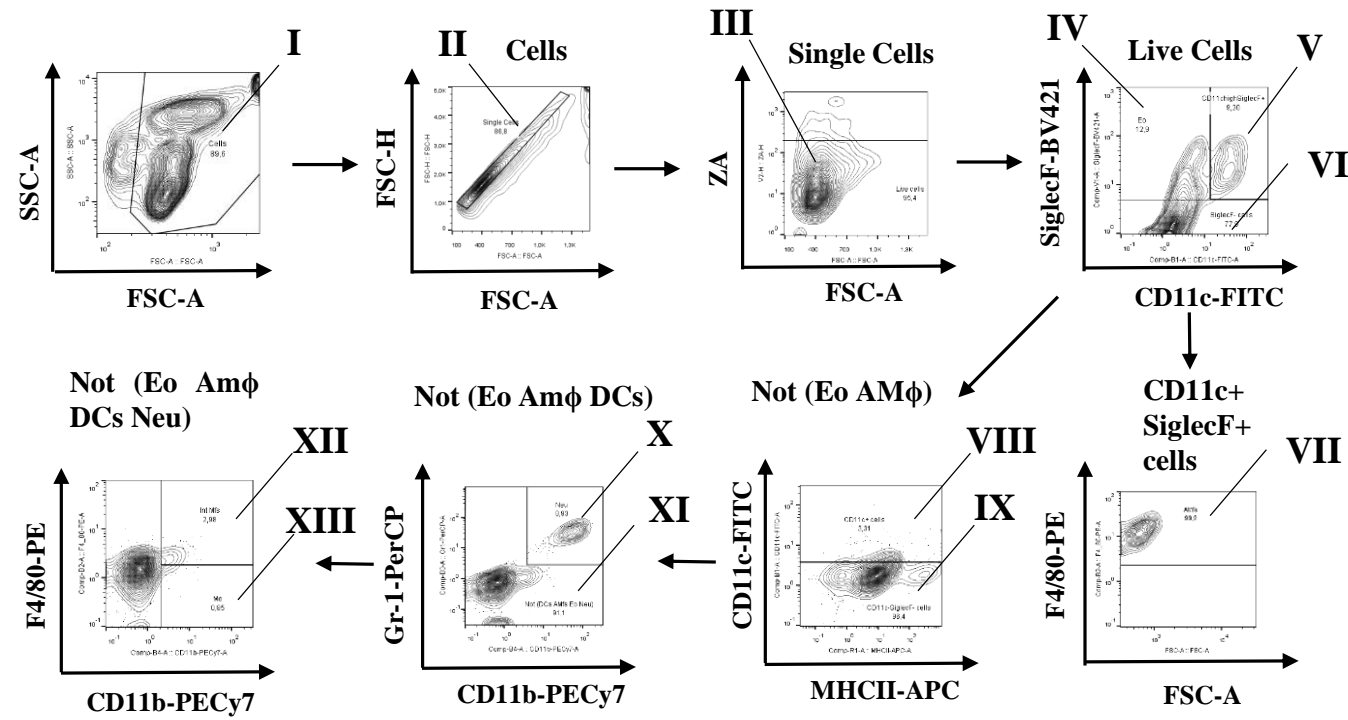

**Figure S3**

Supplement: Supplementary file 4 [file supplementary]

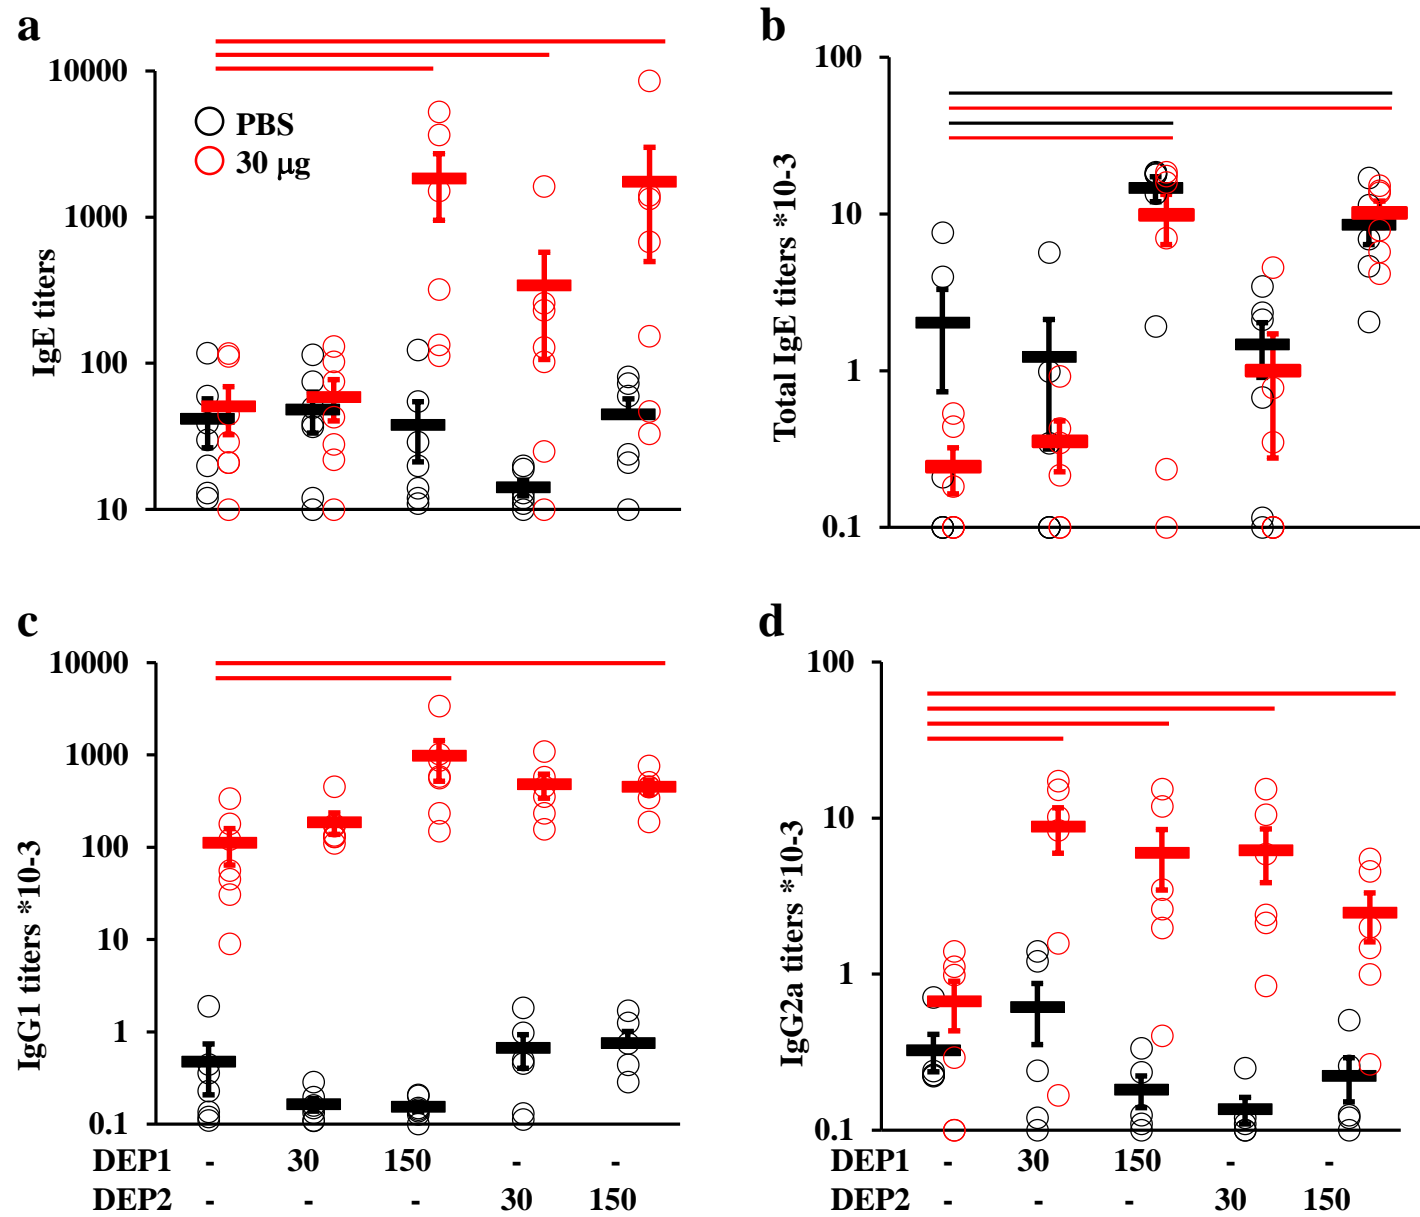

**Figure S1**

Supplement: Supplementary file 5 [file supplementary]
